# Supplementary material for: To work despite chronic health conditions: a qualitative study of workers at the Swedish Public Employment Service
Source: PubMed Central journal article supplement — BMJ Open. 2018 Apr 20;8(4):e019747. doi: 10.1136/bmjopen-2017-019747 (PMC5914773; doi:10.1136/bmjopen-2017-019747), 2018-04-20
Supplement: bmjopen-2017-019747.draft_revisions.pdf [file bmjopen-2017-019747.draft_revisions.pdf]

# BMJ Open

BMJ Open is committed to open peer review. As part of this commitment we make the peer review history of every article we publish publicly available.

When an article is published we post the peer reviewers' comments and the authors' responses online. We also post the versions of the paper that were used during peer review. These are the versions that the peer review comments apply to.

The versions of the paper that follow are the versions that were submitted during the peer review process. They are not the versions of record or the final published versions. They should not be cited or distributed as the published version of this manuscript.

BMJ Open is an open access journal and the full, final, typeset and author-corrected version of record of the manuscript is available on our site with no access controls, subscription charges or pay-per-view fees (<http://bmjopen.bmj.com>).

If you have any questions on BMJ Open's open peer review process please email [info.bmjopen@bmj.com](mailto:info.bmjopen@bmj.com)

# BMJ Open

## To work despite chronic health conditions - A qualitative study of workers at the Swedish Employment Service

|                                 |                                                                                                                                                                                                                                                                                                                                                                                                                                                                                                                                                                                                                                                                                                                                                                   |
|---------------------------------|-------------------------------------------------------------------------------------------------------------------------------------------------------------------------------------------------------------------------------------------------------------------------------------------------------------------------------------------------------------------------------------------------------------------------------------------------------------------------------------------------------------------------------------------------------------------------------------------------------------------------------------------------------------------------------------------------------------------------------------------------------------------|
| Journal:                        | <i>BMJ Open</i>                                                                                                                                                                                                                                                                                                                                                                                                                                                                                                                                                                                                                                                                                                                                                   |
| Manuscript ID                   | bmjopen-2017-019747                                                                                                                                                                                                                                                                                                                                                                                                                                                                                                                                                                                                                                                                                                                                               |
| Article Type:                   | Research                                                                                                                                                                                                                                                                                                                                                                                                                                                                                                                                                                                                                                                                                                                                                          |
| Date Submitted by the Author:   | 27-Sep-2017                                                                                                                                                                                                                                                                                                                                                                                                                                                                                                                                                                                                                                                                                                                                                       |
| Complete List of Authors:       | Hjærtström, Carina; Karolinska Institutet, Unit of Occupational Medicine, Institute of Environmental Medicine; Arbetsformedlingen, Department of Rehabilitation to Work<br>Lindahl Norberg, Annika; Karolinska Institutet, Unit of Occupational Medicine, Institute of Environmental Medicine; Stockholms Lans Landsting, Center for Occupational and Environmental Medicine<br>Johansson, Gun; Karolinska Institutet, Unit of Occupational Medicine, Institute of Environmental Medicine; Stockholms Lans Landsting, Center for Occupational and Environmental Medicine<br>Bodin, Theo; Karolinska Institutet, Unit of Occupational Medicine, Institute of Environmental Medicine; Stockholms Lans Landsting, Center for Occupational and Environmental Medicine |
| <b>Primary Subject Heading</b>: | Occupational and environmental medicine                                                                                                                                                                                                                                                                                                                                                                                                                                                                                                                                                                                                                                                                                                                           |
| Secondary Subject Heading:      | Qualitative research, Rehabilitation medicine                                                                                                                                                                                                                                                                                                                                                                                                                                                                                                                                                                                                                                                                                                                     |
| Keywords:                       | OCCUPATIONAL & INDUSTRIAL MEDICINE, REHABILITATION MEDICINE, PUBLIC HEALTH, QUALITATIVE RESEARCH                                                                                                                                                                                                                                                                                                                                                                                                                                                                                                                                                                                                                                                                  |
|                                 |                                                                                                                                                                                                                                                                                                                                                                                                                                                                                                                                                                                                                                                                                                                                                                   |

SCHOLARONE™  
Manuscripts

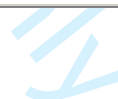

1  
2  
3  
4  
5 **TO WORK DESPITE CHRONIC HEALTH CONDITIONS- A QUALITATIVE STUDY OF WORKERS**  
6  
7 **AT THE SWEDISH EMPLOYMENT SERVICE**

8 Carina Hjærtström<sup>1</sup>, Annika Lindahl Norberg<sup>1,2</sup>, Gun Johansson<sup>1,2</sup>, Theo Bodin<sup>1,2,\*</sup>  
9

10  
11 1 Unit of Occupational Medicine, Institute of Environmental Medicine, Karolinska Institutet,  
12 Stockholm, Sweden

13 2 Center for Occupational and Environmental Medicine, Stockholm County Council, Stockholm,  
14 Sweden  
15

16  
17 Corresponding Author

18 Theo Bodin

19 Centrum för Arbets- och Miljömedicin

20 Solnavägen 4

21 SE-11364 Stockholm

22 SWEDEN

23 [theo.bodin@ki.se](mailto:theo.bodin@ki.se)

24 +46 739 79 25 72  
25

26 Word count excluding abstract: 4189  
27

28 Suggested MeSH terms Workplace, Retirement, Motivation, Leadership, Sweden, Employment,  
29

30 Occupations, Chronic health condition, Work-Life Balance  
31  
32  
33  
34  
35  
36  
37  
38  
39  
40  
41  
42  
43  
44  
45  
46  
47  
48  
49  
50  
51  
52  
53  
54  
55  
56  
57  
58  
59  
60

**ABSTRACT**

**Objectives:** Achieving a sustainable, healthy and long working life is key prerequisite for meeting the demographic challenge posed by an ageing population so that more people can work on into their later years. The objective of this study is to analyse the experiences of a group of employees aged 50-64 with one or more chronic health conditions at the Swedish Public Employment Service in terms of the factors enabling them to keep on working. **Methods:** Ten white-collar workers from three different offices participated in the study. A qualitative method with semi-structured in-depth interviews was used to collect data. **Results and Conclusions:** This study shows that factors enabling people with chronic health conditions to work include adaptation of the work situation by changes in work tasks as well as provision of physical aids. Our study suggest that the changes often come at the employee's initiative, hence, there is potential for greater involvement from the employer, healthcare agencies and the social insurance fund in making it easier for employees to adapt their work situation and in providing information regarding available support. It confirms findings in earlier studies that health plays an important part but also that self confidence and motivation are significant factors contributing to workers being able and wanting to continue working.

### STRENGTHS AND LIMITATIONS OF THIS STUDY

- All participants in this study has been interviewed by a single person with long work experience in occupational health, especially rehabilitation.
- It was evident that the study reached an acceptable saturation with regards to factors related to continuation of work and support needs.
- The description of the study population includes detailed information including self-perceived health and workability index.
- A limitation is that the invitation was sent by the employer and critical voices might have had second thought on participating.
- Chronic health condition is a somewhat ambiguous term and our definition in the invitation might have excluded some potential participants
- Adherence to the COREQ guidelines has been implemented from the start in order to meet the quality standards for both publishing and inclusion in future reviews.

## BACKGROUND

Achieving a sustainable, healthy and long working life is key prerequisite for meeting the demographic challenge posed by an ageing population. By 2060, there will be only two people of working age (15-64 years) in the EU for every person over 65, compared to a ratio of 4-1 today. This will likely lead to a shortage in the labour force and could result in slower economic growth (1).

Sweden has one of the highest rates of employment in the world, including among older workers. In spite of this, 14% of all employees between the ages of 50 and 64 say that, regardless of the state of their health, they do not think that they will be able to work up until the normal retirement age.

Early retirement from work is a complex process which takes place over time and is dependent on numerous different circumstances at both a personal and society level, where health is one of the most important factors. Work ability, motivation and social inclusion are also highlighted as key factors determining the length of people's working life and are established early in life (2).

The number of people with chronic health conditions is rising, which can mostly be attributed to increased life expectancy. Roughly 40% of the population in Europe over the age of 50, including in Sweden, are reckoned to have at least one chronic health condition. Chronic health conditions such as migraines, diabetes and musculoskeletal, respiratory, digestive and psychological health problems increase the risk of early retirement. But this also offers great potential in terms of promoting a better work environment, in a broad sense, for older employees with health problems (3). Because workers with a chronic health condition have been shown to experience more problems, obstacles and needs, the largest gain of occupational intervention can be achieved in these workers (4).

However, there are only a few studies investigating factors in the work environment which play a key role in encouraging people with chronic health conditions to participate in the labour market. There is also a lack of research into how workplaces can adapt to and meet the needs and requirements of employees with chronic health conditions (2). In light of this, it would seem important to analyse the

1  
2  
3 experience of people with chronic health conditions in terms of their working life and work  
4  
5 environment, as well as which factors enable them to work.  
6  
7

8 The aim of this study is to analyse the experiences of a group of employees in terms of the factors  
9  
10 which enable them to work and live with a chronic health condition at the same time.  
11  
12  
13

## 14 **MATERIALS AND METHODS**

### 15 **Preparation of Manuscript**

16  
17 A COREQ checklist designed for qualitative studies, in-depth interviews and focus groups has been  
18  
19 used to ensure that all the components which should be included are described in the existing study  
20  
21  
22 (5).  
23  
24  
25

### 26 **Study population and recruitment**

27  
28 All the study participants worked for the Swedish Public Employment Service, which is a government  
29  
30 agency whose main task is to help match job-seekers with employers.  
31  
32

33 An email invitation was sent via the employer to all staff in three offices during the period December  
34  
35 2016 – January 2017. An additional email was sent out with a reminder. Some offices mentioned the  
36  
37 study at workplace meetings and put the recruitment letter in the employees' mailboxes.  
38  
39

40 The recruitment letter specified the following inclusion criteria: a) Permanent employee as an  
41  
42 administrator at the Swedish Public Employment Service, b) Aged 50-64 and c) one or more chronic  
43  
44 health conditions since at least one year back.  
45  
46

47 Those interested in participating in the study were requested to contact the studies first author via  
48  
49 email or telephone. An assessment was made at the initial contact as to whether the specified  
50  
51 selection criteria were met before a meeting was arranged for a face-to-face interview. The aim was  
52  
53  
54  
55  
56

1  
2  
3 to interview between 8 and 12 participants. The interviews took place between January and March  
4  
5 2017.

## 8 **Interviews**

9  
10 A qualitative method with semi-structured in-depth interviews was used to collect data. The  
11  
12 interviews were conducted at the study participants' respective workplaces during working hours.  
13  
14 The study participants chose where and when the meeting would be held. One of the interviews was  
15  
16 conducted via Skype. All interviews were conducted individually, with one interview per study  
17  
18 participant. The interviews were conducted by the lead author, who is a woman, master's student  
19  
20 and physiotherapist, with more than seven years' work experience in occupational rehabilitation.  
21  
22  
23 The interviews lasted between 45 and 75 minutes. There were also a few minutes where the  
24  
25 interviewer introduced herself, the study and its purpose, and also asked the participant to sign the  
26  
27 consent form. The interviews ended with a summary by the interviewer. Field notes were not made  
28  
29 during the interview.  
30

31  
32  
33 An interview guide approach was used for the interviews. The interview guide was designed by the  
34  
35 study authors and was used in a pilot interview before data was collected.  
36

37  
38 Furthermore, the interview was introduced with four ratings scales relating to work ability, general  
39  
40 state of health and motivation to work. The purpose of the rating scales was to give a fuller  
41  
42 description of the study participants. The following four questions were used to survey self-perceived  
43  
44 work ability, motivation and health:

45  
46 1) How would you assess your current work ability compared to when it was at its peak on a scale  
47  
48 from 0 to 10? (0 = cannot work at all, 10 = work ability when it is/was at its peak) 2) Thinking about  
49  
50 your health – do you think that you can still be doing your current job in two years? (No, I don't, I  
51  
52 don't really know, Yes, I definitely will be). 3) How important is work to you on a scale from 1 to 10?  
53  
54  
55  
56



1  
2  
3 (0 = not at all important, 10 = extremely important. 4) How would you assess your general state of  
4 health? (very good, good, reasonable, poor and very poor).  
5  
6  
7

## 8 **Analysis**

9  
10 The interviews were recorded, transcribed verbatim and coded by the lead author. Thematic analysis  
11 was used for analysis (6). The entire analysis covered six phases: reading and re-reading the  
12 transcripts, initial coding, identifying themes, reviewing the themes in relation to the coded data,  
13 defining and describing the themes, and finally producing a synthesis of the results in this paper. The  
14 analysis were based on the study participants' manifest statements. The analysis was performed by  
15 the lead author, who throughout the analysis process discussed the coding and the themes with the  
16 co-authors. The rest of the research team comprises a doctor, sociologist and psychologist, who all  
17 hold PhDs. Transcriptions were not sent to the informants.  
18  
19  
20  
21  
22  
23  
24  
25  
26

27 Quotes from the study participants, which are presented in the results section, appear in italics. The  
28 word order has sometimes been changed and they have been shortened to make them easier to  
29 read. Some words have been removed to avoid identification.  
30  
31  
32  
33  
34

## 35 **Ethical considerations**

36 The study has been approved by the Regional Ethical Review Board in Stockholm, reference number  
37 2016/2105-31/5.  
38  
39  
40  
41  
42

## 43 **RESULTS**

### 44 **Description of the study population**

45  
46 Ten employees from three different offices expressed an interest in the study. They all met specified  
47 criteria and participated in the study. Informants' characteristics are summarized in table 1. The most  
48 frequently occurring chronic health conditions were long-term pain conditions, hearing loss, state of  
49 fatigue, as well as cardiovascular diseases. Four study participants had one condition, two persons  
50  
51  
52  
53  
54  
55  
56

1  
2  
3 had two conditions and the remaining four had three or more. One person was on sick leave 25% of  
4  
5 the time. Current work ability, compared to when it was at its best was high (median = 8) for all  
6  
7 participants except one individual who indicated 2 on the scale from 0-10. In terms of forecasting  
8  
9 their work ability in two years from now, in light of their current state of health, seven out of ten  
10  
11 study participants reckoned they were sure that they could do their current job in two years if the  
12  
13 same circumstances applied. Most of them considered their general state of health to be fairly good  
14  
15 or acceptable, in spite of enduring restrictions for many years due to chronic health conditions. Work  
16  
17 was considered to be important in many respects by all the study participants.  
18  
19

20  
21 Insert table 1 here  
22  
23

#### 24 **Factors affecting opportunities to work in spite of having a chronic health condition**

25 The results obtained produced 5 main themes and 13 sub-themes (table 2). The themes are  
26  
27 presented in no particular order of precedence.  
28  
29

30  
31 Insert table 2 here  
32  
33

#### 34 Adaptation of work

35  
36 **Physical adaptation/aid**, such as an adapted chair, an adjustment made to a computer workstation  
37  
38 and their own office were mentioned as significant and important requirements for coping with work  
39  
40 by the participants who had received this type of support. Several study participants had the  
41  
42 perception that their employer was generous with providing physical aids if they were asked to do  
43  
44 so. On the other hand, requests for aids were seldom made as they did not know what they should  
45  
46 ask for, what might make things easier or they did not take the time to ask. The difficulty in getting  
47  
48 their own office adapted appeared to be a major obstacle to them coping with their work.  
49  
50

51  
52 "I find it extremely hard to concentrate and take in what I'm doing when there are several of us in an  
53  
54 office"- participant number 7  
55  
56

57  
58  
59  
60 8

1  
2  
3 "There are no problems getting help. I've always had good gadgets, a suitable chair, a Mousetrapper  
4 mouse and other devices to help me at my workstation. I'm eternally grateful for this." - participant  
5 number 6  
6  
7

8  
9  
10 **Modifications to work tasks** resulted in fewer physical and mental demands. Examples of these  
11 modifications included fewer, but more specialised tasks, less customer contact, greater opportunity  
12 for own planning and, in some cases, less administration. One participant said that the process of  
13 getting adaptations made to both equipment and tasks was complicated and time-consuming:  
14  
15

16  
17  
18 "I would have avoided a great deal of stomach-ache if it hadn't been so complicated. Because there  
19 is actually mental stress involved as well. The whole thing took a good year. If it had gone a bit more  
20 quickly, I might have perhaps been in a better state than I am now."- participant number 4  
21  
22  
23

24  
25  
26 And I have a good boss who has been keen to find suitable tasks for me to do. My bosses have  
27 actually shown that they want things to work for me during the years that I've got left."  
28  
29 - participant number 10  
30  
31

32  
33  
34 "I used to have greater responsibility in my job, but I felt that it got too much for me. I needed to  
35 change the tasks I did for the good of my health. This means that what works for me now is less  
36 responsibility, flexitime and I can manage my time better. I now enjoy my job too!" - participant  
37 number 3  
38  
39  
40

41  
42  
43 **A change in the approach to work**, based on work arrangements and suitable strategies, played a  
44 significant role in making work easier. Strategies which emerged included using flexitime, planning  
45 the working day, varying posture while working and taking breaks.  
46  
47  
48

49  
50 "I don't need to go off sick. If my work allows it, I can work flexitime and go home earlier that day to  
51 rest. And I can now also plan my new work tasks better." participant number 10  
52  
53  
54

## Life style

Physical activity and work/life balance seemed to be important elements in terms of coping better with working life.

**Work/life balance** was linked to a sense of well-being and work ability. Doing some kind of leisure activity was a way of recharging the batteries and relaxing mentally, which seemed to be especially important for jobs involving a high level of mental stress. Study participants who had adapted their work tasks were largely seen to have a good work/life balance.

"When I'm doing my hobby and producing something with my hands, it's a way for me to get rid of everything – clear my memory somehow, as it were." - participant number 1

"Then, when I was given other work tasks to do I gained a better balance. I can do things in my spare time like go to the gym and do other nice things." - participant number 10

**Physical activity** was a strategy used by many to improve their state of health, both physical and mental, thereby enabling them to cope with work better. In those cases where participants could not do any physical activity, they mentioned a deterioration in their condition: *"One thing that's extremely important is that if I don't move about, I feel worse. A gym class and yoga are very important, just as important as the medication I take."* - participant number 10

## Confidence in one's own abilities

Confidence was reflected in the study participants' own view of their condition, their acceptance of it and of a feeling that they had a chance to influence their situation.

**Acceptance** of the state of their health was prominent among the interviewees. In spite of the restrictions which the disease entailed, most of them voiced the attitude "when life gives you lemons you make lemonade" and that their situation could have been worse.

"I'm almost constantly in pain, but you still learn to live with it somehow." - participant number 9

1  
2  
3 Confidence in their own ability was perceived to be high, in spite of the tough conditions they  
4  
5 endured, as one study participant put it:

6  
7  
8 “I couldn’t keep doing the job I was doing then, when I was very ill, but when I got better, I wanted  
9  
10 this job 100% and everyone said that I was mad... But I said that it was maybe something that I could  
11  
12 definitely do. Otherwise, I might as well stop.” - participant number 7

13  
14  
15 **Perceived decision latitude**, in terms of the ability to change their work environment and work  
16  
17 situation, they perceived a high probability of this. Overall, everyone felt that they could influence  
18  
19 their situation in some way, if they wanted: *“If there’s something wrong, I fix it. I don’t just sit there*  
20  
21 *and wait for someone else to do something.”* - participant number 1

## 22 23 24 Motivation

25  
26 Motivation was perceived as an important driver for wanting and managing to work when in poor  
27  
28 health. Intellectual stimulation, social cohesion and sense of purpose were prominent factors  
29  
30 contributing to increased motivation. Even though some participants encountered major difficulties  
31  
32 due to their condition, they expressed a strong motivation to work and find solutions enabling them  
33  
34 to continue their working life.

35  
36  
37 *“Even the doctors said, when I got ill and was very bad, that my stubbornness, desire and motivation*  
38  
39 *meant that it was so good that I could manage to do as much as I could.”* participant number 7

40  
41  
42 **Intellectual stimulus**, with interesting and varied work tasks was what the study participants  
43  
44 regarded as providing increased motivation for continuing to work: *“I’m lucky that I think I’ve got a*  
45  
46 *job that I enjoy and find interesting. Otherwise, I would have gone home a long time ago and gone on*  
47  
48 *sick leave.”* - participant number 4

49  
50  
51 **Social cohesion**, through work and being involved, was a noticeably important factor and driver for  
52  
53 work. “The job is extremely important. That’s all there is to it. It’s particularly important since I can  
54  
55

1  
2  
3 enjoy the social aspect and be stimulated. It definitely means that I enjoy it a great deal." - participant  
4  
5 number 7  
6  
7

8 **Sense of purpose** and perceptions that the work they do benefited other people in difficult situations  
9  
10 gave them added satisfaction: "... *apart from working to pay for food and rent, work is definitely a*  
11  
12 *major driving force for the social side of things, allowing you to feel that you can make a difference.*" -  
13  
14 participant number 8  
15

### 16 Supporting structures

17  
18 Three different sub-themes relating to support seemed to be important for helping them work with  
19  
20 their condition. Support from superior, support from healthcare agencies and support from the social  
21  
22 insurance fund made things easier.  
23  
24

25  
26 **Support from superiors** took, for example, the form of setting boundaries, a long-term rehabilitation  
27  
28 plan and assistance with finding other tasks to do. Study participants said that this support  
29  
30 contributed to peace of mind, reduced anxiety and meant less time off sick. "*It was the prompt*  
31  
32 *support I got from my boss and the company's healthcare team. I would say that it was completely*  
33  
34 *down to the help I got and my own attitude that I could go back to work.*" - participant number 6  
35  
36  
37

38 **Support from the healthcare team**, which included different healthcare agencies, such as primary  
39  
40 care, specialists and the company healthcare team. Suitable medical and behavioural treatment,  
41  
42 guided physical activity, physical treatment, knowledge of self-care and individual training, assistance  
43  
44 with getting their own office and, to a certain degree, advice about job scope were some of the  
45  
46 forms of support provided. Support from the healthcare agencies was considered to be just as vital  
47  
48 for those who had received it and a major loss for those did not receive it. But some said that the  
49  
50 company's healthcare team were seldom represented and there was uncertainty perceived about  
51  
52 the type of support they could give. Others mentioned the contribution made by the company's  
53  
54 healthcare team, with support for a change in behaviour in relation to achieving an activity balance.  
55  
56

57 12  
58  
59  
60

1  
2  
3 “I’ve got a specialist doctor and feel supported. I feel lucky. Then, I’ve got a good healthcare centre.  
4  
5 I’m insisting on working. My doctor says that it is indeed up to me to decide this.” - participant  
6  
7 number 2  
8  
9

10 **Support from the social insurance fund**, in cooperation with the employer, seemed to some study  
11  
12 participants to be a success factor in terms of finding a sustainable work situation. The support  
13  
14 measures implemented were a long-term rehabilitation plan, work training, an opportunity to try out  
15  
16 new work tasks and a gradual increase in working hours as the study participants’ well-being  
17  
18 improved. This helped these study participants to find, after a time, a sustainable solution and  
19  
20 achieve a balance in their working hours and tasks. One interviewee with recurring depression,  
21  
22 where the time factor was important for recovery and finding other suitable duties and who  
23  
24 gradually stepped things up without experiencing any stress, said that *“One of the best sources of*  
25  
26 *support came from the social insurance fund and my employer, who didn’t push too hard.”* -  
27  
28 participant number 10  
29  
30  
31  
32

### 33 **DISCUSSION**

34  
35 The analysis process highlighted five main themes which influence the opportunities for working,  
36  
37 even when suffering from a chronic health condition. Major emphasis has been placed on describing  
38  
39 factors which enable rather than hindering work when someone has a chronic health condition. The  
40  
41 study’s results show with good consensus that factors enabling people to work while suffering a  
42  
43 chronic health condition include adapting the work situation by changing work tasks completely or  
44  
45 partially, providing physical aids and by changing one’s behaviour. The study participants’ view of  
46  
47 their condition, their confidence in their own ability and motivation to work were also significant  
48  
49 factors contributing to them wanting and being able to work. Likewise, they all felt that they could, if  
50  
51 they wanted, influence both their work situation and work environment to a certain degree.  
52  
53  
54  
55  
56

1  
2  
3 Several study participants had changed job with the main reason considered for this being their poor  
4 health. Changing job is a major adjustment in general and probably adds to the stress in the case of  
5 an ongoing condition. In spite of a general low rate of mobility on the Swedish labour market,  
6  
7 employers' negative attitudes to people in poor health (7) and employers' lack of awareness about  
8  
9 adaptation options available (8), this highlights that the study group has strong confidence in their  
10  
11 own ability, strong cognitive capacity and motivation to adapt their situation to make their work life  
12  
13 sustainable. However, several study participants were reported to have changed job without  
14  
15 indicating the main reason to the employer.  
16  
17  
18

19  
20 **Adaptation measures** in the workplace offer relevant support with a positive impact on work ability  
21  
22 (9,10). Employers are required by law to adapt working conditions to individuals' different physical  
23  
24 and mental requirements (11). Possible reasons for failing to or delaying adaptations are numerous  
25  
26 changes of manager, ignorance of the issue among employers or study participants deciding not to  
27  
28 mention any support requirements. Norstedt (2016) highlights difficulties which people who have  
29  
30 hidden functional impairments have about mentioning this in their workplaces as their perceptions  
31  
32 are that it can result in adverse consequences (12). Other studies have suggested that dialogue  
33  
34 between the employer and employee and tailored work-related interventions may be helpful (13).  
35  
36 This is confirmed in this study where the study participants who decided to talk to their employer  
37  
38 about this matter have perceived that they have received good adaptations and support.  
39  
40  
41

42 **Lifestyle factors**, such as physical activity and the opportunity to achieve a balance in the activities  
43  
44 people do during and between work and their leisure time seemed to play a significant role. Physical  
45  
46 activity in particular seemed to be a strong contributory factor in preventing their health from  
47  
48 deteriorating, thereby improving their ability to work, which tallies with the findings from other  
49  
50 research studies (14).  
51  
52  
53

54 **Confidence in one's own ability** is mentioned in the literature, under the terms "self-efficacy" or  
55  
56 "coping", as playing a significant role in how an individual handles a specific situation and the  
57  
58 14  
59  
60



1  
2  
3 opportunity to influence their situation (15). The group as a whole had a pragmatic view of their  
4  
5 conditions and generally showed broad acceptance of their situation and a high level of confidence in  
6  
7 their own ability. From an outsiders perspective, their health status did not seem to correspond with  
8  
9 the participants perceived health and their self-reported work ability. Confidence in their own ability  
10  
11 could also have been reinforced by the fact that most of the study participants felt that they had the  
12  
13 opportunity, if they wanted, to influence both their work environment and work situation. It is well  
14  
15 known that a high degree of autonomy and adjustment latitude reduce the risk of people being on  
16  
17 sick leave and obtaining sickness benefit (3,16).  
18

19  
20 **Motivation** appeared to be a dominating and significantly contributing factor making it possible to  
21  
22 work. Motivation to work was perceived as high across the board, irrespective of the extent of and  
23  
24 the level of difficulty entailed by their state of health. Factors which contributed to motivation to  
25  
26 work were intellectual stimulation, social cohesion and sense of purpose. These factors largely tie in  
27  
28 with Antonovsky's theory (1987) on health, SOC - sense of coherence (17) - where comprehensibility,  
29  
30 manageability, and meaningfulness are significant factors contributing to an individual's perceived  
31  
32 health.  
33

34  
35  
36 **Support**, especially from a superior, contributes to creating the opportunities for a longer working  
37  
38 life and has a positive impact on people's health (18,19). This was confirmed by some of the study  
39  
40 participants, who received support from their boss in different ways, including finding suitable work  
41  
42 tasks and adapting the way of working. Study participants who additionally received support from  
43  
44 the healthcare team and social insurance fund acknowledged that this was a further boosting factor.  
45  
46 These results are in line with findings by others, that employers who adopt a structured approach to  
47  
48 rehabilitation, cooperate with other agencies and have strong leadership functions have healthier  
49  
50 employees (20).  
51

52  
53  
54 The study participants felt a general lack of support from the healthcare agencies, which is common  
55  
56 among people with a chronic health condition (21). National guidelines indicate the importance of  
57  
58  
59  
60

1  
2  
3 the support provided by healthcare agencies in terms of rehabilitation by offering continuous,  
4  
5 coordinated care to people with a chronic health condition of working age, enabling them to cope  
6  
7 with working life (22). Varekamp et al. (2006) also highlight the importance of the overlap between  
8  
9 the provision of healthcare and rehabilitation geared towards working life (23).

10  
11  
12 Semi-structured, in-depth interviews give greater scope for individuals to talk about their  
13  
14 experiences and thoughts. It is regarded as a flexible and tried-and-trusted method for gathering  
15  
16 data in the field of healthcare research (24).

17  
18  
19 This study is limited to a small number of participants and a single employer, although three different  
20  
21 offices and cities. In spite of the small numbers, the data material gathered is considered to have  
22  
23 achieved saturation, based on the study's questions. This was indicated by a large level of consensus  
24  
25 and recurrently similar answers within the question areas. This was true in spite of different genders,  
26  
27 professional categories and workplaces featuring in the study.

28  
29  
30 The study author's experience of working in the field of work-related rehabilitation and of working  
31  
32 for the same employer as the study participants is mainly considered to be a strength as it made it  
33  
34 possible to ask follow-up questions and go into greater depth on various questions.

## 35 36 37 38 39 **CONCLUSIONS**

40  
41 This study found that factors enabling workers with chronic health conditions to work include  
42  
43 adaptation of the work situation by changes in work tasks as well as provision of physical aids. Our  
44  
45 study suggest that the changes may come at the employee's initiative, hence, there is potential for  
46  
47 greater involvement from the employer, healthcare agencies and the social insurance fund in making  
48  
49 it easier for employees to adapt their work situation and in providing information regarding available  
50  
51 support. It confirms findings in earlier studies that health plays an important part but also that self-  
52  
53 efficacy and motivation are significant factors contributing to workers being able and wanting to  
54  
55 continue working.

## ACKNOWLEDGEMENTS

I would like to sincerely thank all the study participants who took the time to take part and talk about their experiences. I hope that I have done justice to the information you provided. I would also like to thank the employers for agreeing to participate and to those who helped with sending out the study invitations.

## CONTRIBUTORSHIP STATEMENT

The study was conceived by Carina Hjartström and Theo Bodin. The study protocol and was developed by Carina Hjartström, Annika Lindah Norberg and Theo Bodin. The interviews were recorded, transcribed verbatim by Carina Hjartström, and analysed by Carina Hjartström under supervision from Annika Lindah Norberg. The interpretation of the findings was done by Carina Hjartström, Annika Lindah Norberg, Gun Johansson and Theo Bodin. The first draft of the manuscript was done by Carina Hjartström. All subsequent drafts were commented upon and revised by all authors. The submitted version of the manuscript was approved by all authors.

## COMPETING INTERESTS

Carina Hjartström works at the Swedish Public Employment Service. The employer was not involved in designing and analysing the study and had no influence over the study's conclusions. The other authors state that they have no conflicts of interest or objections.

## FUNDING

This Study was supported by the Swedish Research Council for Health, Working Life and Welfare, FORTE

## DATA SHARING STATEMENT

1  
2  
3 This study does not include any data that could be shared  
4  
5  
6  
7  
8  
9  
10  
11  
12  
13  
14  
15  
16  
17  
18  
19  
20  
21  
22  
23  
24  
25  
26  
27  
28  
29  
30  
31  
32  
33  
34  
35  
36  
37  
38  
39  
40  
41  
42  
43  
44  
45  
46  
47  
48  
49  
50  
51  
52  
53  
54  
55  
56  
57  
58  
59  
60

For peer review only

**REFERENCES:**

1. de Jong PR. Sickness, disability and work: breaking the barriers—a synthesis of findings across OECD countries—by OECD. *Int Soc Secur Rev.* 2011;64(3):103–4.
2. Hasselhorn HM, Apt W. Understanding employment participation of older workers: Creating a knowledge base for future labour market challenges. Berlin; 2015.
3. Leijten FRM, de Wind A, van den Heuvel SG, Ybema JF, van der Beek AJ, Robroek SJW, et al. The influence of chronic health problems and work-related factors on loss of paid employment among older workers. *J Epidemiol Community Health.* 2015;69(11):1058–65.
4. Koolhaas W, van der Klink JJJ, Vervoort JPM, de Boer MR, Brouwer S, Groothoff JW. In-depth study of the workers' perspectives to enhance sustainable working life: comparison between workers with and without a chronic health condition. *J Occup Rehabil.* 2013 Jun;23(2):170–9.
5. Tong A, Sainsbury P, Craig J. Consolidated criteria for reporting qualitative research (COREQ): a 32- item checklist for interviews and focus groups. *Int J Qual Health Care.* 2007;19(6):349–57.
6. Braun V, Clarke V. Using thematic analysis in psychology. *Qual Res Psychol.* 2006;3(2):77–101.
7. Ekberg K, Eklund M, Hensing G. Återgång i arbete : processer, bedömningar, åtgärder. 1. uppl. Lund: Lund : Studentlitteratur; 2015.
8. Kaye H, Jans L, Jones E. Why Don't Employers Hire and Retain Workers with Disabilities? *J Occup Rehabil.* 2011;21(4):526–36.

- 1  
2  
3 9. Franche R-L, Cullen K, Clarke J, Irvin E, Sinclair S, Frank J. Workplace- Based Return-to-  
4  
5 Work Interventions: A Systematic Review of the Quantitative Literature. *J Occup Rehabil.*  
6  
7 2005;15(4):607–31.  
8  
9
- 10 10. Vooijs M, Leensen MC, Hoving JL, Wind H, Frings-Dresen MH. Interventions to enhance  
11  
12 work participation of workers with a chronic disease: a systematic review of reviews. *Occup Env*  
13  
14 *Med.* 2015 Nov;72(11):820–6.  
15  
16
- 17 11. Arbetsmiljöverket. Arbetsanpassning och rehabilitering AFS 1994:1. Stockholm:  
18  
19 Arbetsmiljöverket; 1994.  
20  
21
- 22 12. Norstedt M. Att avslöja sina dolda funktionsnedsättningar i arbetslivet. *Arbetsmarknad*  
23  
24 *Arbetsliv.* 2016;22(2):36–48.  
25  
26
- 27 13. De Wind A, Geuskens GA, Reeuwijk KG, Westerman MJ, Ybema JF, Burdorf A, et al.  
28  
29 Pathways through which health influences early retirement: a qualitative study. *BMC Public Health.*  
30  
31 2013;13(1):292.  
32  
33
- 34 14. Arvidson E, Börjesson M, Ahlborg G, Lindegård A, Jonsdottir IH. The level of leisure  
35  
36 time physical activity is associated with work ability-a cross sectional and prospective study of health  
37  
38 care workers. *BMC Public Health.* 2013;13(1):855.  
39  
40
- 41 15. Dehlin O, Hagberg B. Inte hur man har det utan hur man tar det. *Läkartidningen.*  
42  
43 2000;97(5):430–3.  
44  
45
- 46 16. Johansson G, Lundberg I. Adjustment latitude and attendance requirements as  
47  
48 determinants of sickness absence or attendance. Empirical tests of the illness flexibility model. *Soc*  
49  
50 *Sci Med.* 2004;58(10):1857–68.  
51  
52  
53  
54  
55  
56

- 1  
2  
3 17. Antonovsky A. Unraveling the mystery of health: How people manage stress and stay  
4 well. Jossey-Bass; 1987.  
5  
6  
7  
8 18. Krause N, Lynch J, Kaplan GA, Cohen RD, Goldberg DE, Salonen JT. Predictors of  
9 disability retirement. *Scand J Work Env Health*. 1997;23(6):403–13.  
10  
11  
12  
13 19. Searle B, Bright JEH, Bochner S. Helping people to sort it out: The role of social support  
14 in the Job Strain Model. *Work Stress*. 2001;15(4):328–46.  
15  
16  
17  
18 20. Svartengren M, Stoetzer U, Parmasund M, Eriksson T, Stöllman Å, Vingård E. Hälsa och  
19 framtid i kommuner och landsting. Stockholm; 2013.  
20  
21  
22  
23 21. Socialstyrelsen. Hälsa- och sjukvård vid kroniska sjukdomar. Socialstyrelsen; 2015.  
24  
25  
26  
27 22. Government of Sweden. Nationell strategi för att förebygga och behandla kroniska  
28 sjukdomar : 2014-2017. Stockholm: Socialdepartementet, Regeringskansliet; 2014.  
29  
30  
31  
32 23. Varekamp I, Verbeek JH, van Dijk FJ. How can we help employees with chronic  
33 diseases to stay at work? A review of interventions aimed at job retention and based on an  
34 empowerment perspective. *Int Arch Occup Env Health*. 2006 Nov;80(2):87–97.  
35  
36  
37  
38  
39 24. Diccico-Bloom B, Crabtree BF. The qualitative research interview. *Med Educ*.  
40 2006;40(4):314–21.  
41  
42  
43  
44  
45  
46  
47  
48  
49  
50  
51  
52  
53  
54  
55  
56  
57  
58  
59  
60

**Table 1.** Background information and characteristics of informants (n=10).

|                                                            |                         |              |
|------------------------------------------------------------|-------------------------|--------------|
| <b>Sex</b>                                                 | Men                     | 2            |
|                                                            | Women                   | 8            |
| <b>Age</b>                                                 | Median (range)          | 59,5 (51-63) |
| <b>Educational level</b>                                   | High-school or lower    | 4            |
|                                                            | University              | 6            |
| <b>Health status</b>                                       | Very poor               | 0            |
|                                                            | Poor                    | 0            |
|                                                            | Reasonable              | 5            |
|                                                            | Good                    | 5            |
|                                                            | Very good               | 0            |
| <b>Years with chronic health condition</b>                 | > 5 years               | 2            |
|                                                            | > 10 years              | 8            |
| <b>Most common chronic health conditions</b>               | Chronic pain condition  |              |
|                                                            | Hearing loss            |              |
|                                                            | Burnout/chronic fatigue |              |
|                                                            | Cardiovascular disease  |              |
| <b>Employment activity</b>                                 | Part-time               | 3            |
|                                                            | Fulltime                | 7            |
| <b>Years at current employer</b>                           | 8 – 30 years            |              |
| <b>Importance of work (1-10)</b>                           | Median (range)          | 8(5-9)       |
| <b>Work ability (0-10)</b>                                 | Median (range)          | 8 (2-9)      |
| <b>Will be working at the same job in 2 years from now</b> | No                      | 0            |
|                                                            | Don't know              | 3            |
|                                                            | Yes, definitely         | 7            |



**Table 2.** Thematic analysis of factors enabling work despite chronic health conditions

| Main theme                        | Sub-theme                                                                             |
|-----------------------------------|---------------------------------------------------------------------------------------|
| Adaptation                        | Physical adaptation/aid<br>Modifications to work tasks<br>Changes in approach to work |
| Life-style                        | Work/life balance<br>Physical activity                                                |
| Confidence in one's own abilities | Acceptance<br>Decision latitude                                                       |
| Motivation                        | Intellectual stimulus<br>Social cohesion<br>Sense of purpose                          |
| Support from others               | Superiors<br>Healthcare<br>Social security                                            |

## COREQ (CONsolidated criteria for REporting Qualitative research) Checklist

A checklist of items that should be included in reports of qualitative research. You must report the page number in your manuscript where you consider each of the items listed in this checklist. If you have not included this information, either revise your manuscript accordingly before submitting or note N/A.

| Topic                                          | Item No. | Guide Questions/Description                                                                                                                              | Reported on Page No. |
|------------------------------------------------|----------|----------------------------------------------------------------------------------------------------------------------------------------------------------|----------------------|
| <b>Domain 1: Research team and reflexivity</b> |          |                                                                                                                                                          |                      |
| <i>Personal characteristics</i>                |          |                                                                                                                                                          |                      |
| Interviewer/facilitator                        | 1        | Which author/s conducted the interview or focus group?                                                                                                   |                      |
| Credentials                                    | 2        | What were the researcher's credentials? E.g. PhD, MD                                                                                                     |                      |
| Occupation                                     | 3        | What was their occupation at the time of the study?                                                                                                      |                      |
| Gender                                         | 4        | Was the researcher male or female?                                                                                                                       |                      |
| Experience and training                        | 5        | What experience or training did the researcher have?                                                                                                     |                      |
| <i>Relationship with participants</i>          |          |                                                                                                                                                          |                      |
| Relationship established                       | 6        | Was a relationship established prior to study commencement?                                                                                              |                      |
| Participant knowledge of the interviewer       | 7        | What did the participants know about the researcher? e.g. personal goals, reasons for doing the research                                                 |                      |
| Interviewer characteristics                    | 8        | What characteristics were reported about the interviewer/facilitator? e.g. Bias, assumptions, reasons and interests in the research topic                |                      |
| <b>Domain 2: Study design</b>                  |          |                                                                                                                                                          |                      |
| <i>Theoretical framework</i>                   |          |                                                                                                                                                          |                      |
| Methodological orientation and Theory          | 9        | What methodological orientation was stated to underpin the study? e.g. grounded theory, discourse analysis, ethnography, phenomenology, content analysis |                      |
| <i>Participant selection</i>                   |          |                                                                                                                                                          |                      |
| Sampling                                       | 10       | How were participants selected? e.g. purposive, convenience, consecutive, snowball                                                                       |                      |
| Method of approach                             | 11       | How were participants approached? e.g. face-to-face, telephone, mail, email                                                                              |                      |
| Sample size                                    | 12       | How many participants were in the study?                                                                                                                 |                      |
| Non-participation                              | 13       | How many people refused to participate or dropped out? Reasons?                                                                                          |                      |
| <i>Setting</i>                                 |          |                                                                                                                                                          |                      |
| Setting of data collection                     | 14       | Where was the data collected? e.g. home, clinic, workplace                                                                                               |                      |
| Presence of non-participants                   | 15       | Was anyone else present besides the participants and researchers?                                                                                        |                      |
| Description of sample                          | 16       | What are the important characteristics of the sample? e.g. demographic data, date                                                                        |                      |
| <i>Data collection</i>                         |          |                                                                                                                                                          |                      |
| Interview guide                                | 17       | Were questions, prompts, guides provided by the authors? Was it pilot tested?                                                                            |                      |
| Repeat interviews                              | 18       | Were repeat interviews carried out? If yes, how many?                                                                                                    |                      |
| Audio/visual recording                         | 19       | Did the research use audio or visual recording to collect the data?                                                                                      |                      |
| Field notes                                    | 20       | Were field notes made during and/or after the interview or focus group?                                                                                  |                      |
| Duration                                       | 21       | What was the duration of the interviews or focus group?                                                                                                  |                      |
| Data saturation                                | 22       | Was data saturation discussed?                                                                                                                           |                      |
| Transcripts returned                           | 23       | Were transcripts returned to participants for comment and/or                                                                                             |                      |

| Topic                                  | Item No. | Guide Questions/Description                                                                                                        | Reported on Page No. |
|----------------------------------------|----------|------------------------------------------------------------------------------------------------------------------------------------|----------------------|
|                                        |          | correction?                                                                                                                        |                      |
| <b>Domain 3: analysis and findings</b> |          |                                                                                                                                    |                      |
| <i>Data analysis</i>                   |          |                                                                                                                                    |                      |
| Number of data coders                  | 24       | How many data coders coded the data?                                                                                               |                      |
| Description of the coding tree         | 25       | Did authors provide a description of the coding tree?                                                                              |                      |
| Derivation of themes                   | 26       | Were themes identified in advance or derived from the data?                                                                        |                      |
| Software                               | 27       | What software, if applicable, was used to manage the data?                                                                         |                      |
| Participant checking                   | 28       | Did participants provide feedback on the findings?                                                                                 |                      |
| <i>Reporting</i>                       |          |                                                                                                                                    |                      |
| Quotations presented                   | 29       | Were participant quotations presented to illustrate the themes/findings?<br>Was each quotation identified? e.g. participant number |                      |
| Data and findings consistent           | 30       | Was there consistency between the data presented and the findings?                                                                 |                      |
| Clarity of major themes                | 31       | Were major themes clearly presented in the findings?                                                                               |                      |
| Clarity of minor themes                | 32       | Is there a description of diverse cases or discussion of minor themes?                                                             |                      |

Developed from: Tong A, Sainsbury P, Craig J. Consolidated criteria for reporting qualitative research (COREQ): a 32-item checklist for interviews and focus groups. *International Journal for Quality in Health Care*. 2007. Volume 19, Number 6: pp. 349 – 357

**Once you have completed this checklist, please save a copy and upload it as part of your submission. DO NOT include this checklist as part of the main manuscript document. It must be uploaded as a separate file.**

# BMJ Open

## To work despite chronic health conditions - A qualitative study of workers at the Swedish Employment Service

|                                 |                                                                                                                                                                                                                                                                                                                                                                                                                                                                                                                                                                                                                                                                                                                                                                   |
|---------------------------------|-------------------------------------------------------------------------------------------------------------------------------------------------------------------------------------------------------------------------------------------------------------------------------------------------------------------------------------------------------------------------------------------------------------------------------------------------------------------------------------------------------------------------------------------------------------------------------------------------------------------------------------------------------------------------------------------------------------------------------------------------------------------|
| Journal:                        | <i>BMJ Open</i>                                                                                                                                                                                                                                                                                                                                                                                                                                                                                                                                                                                                                                                                                                                                                   |
| Manuscript ID                   | bmjopen-2017-019747.R1                                                                                                                                                                                                                                                                                                                                                                                                                                                                                                                                                                                                                                                                                                                                            |
| Article Type:                   | Research                                                                                                                                                                                                                                                                                                                                                                                                                                                                                                                                                                                                                                                                                                                                                          |
| Date Submitted by the Author:   | 30-Jan-2018                                                                                                                                                                                                                                                                                                                                                                                                                                                                                                                                                                                                                                                                                                                                                       |
| Complete List of Authors:       | Hjærtström, Carina; Karolinska Institutet, Unit of Occupational Medicine, Institute of Environmental Medicine; Arbetsformedlingen, Department of Rehabilitation to Work<br>Lindahl Norberg, Annika; Karolinska Institutet, Unit of Occupational Medicine, Institute of Environmental Medicine; Stockholms Lans Landsting, Center for Occupational and Environmental Medicine<br>Johansson, Gun; Karolinska Institutet, Unit of Occupational Medicine, Institute of Environmental Medicine; Stockholms Lans Landsting, Center for Occupational and Environmental Medicine<br>Bodin, Theo; Karolinska Institutet, Unit of Occupational Medicine, Institute of Environmental Medicine; Stockholms Lans Landsting, Center for Occupational and Environmental Medicine |
| <b>Primary Subject Heading</b>: | Occupational and environmental medicine                                                                                                                                                                                                                                                                                                                                                                                                                                                                                                                                                                                                                                                                                                                           |
| Secondary Subject Heading:      | Qualitative research, Rehabilitation medicine                                                                                                                                                                                                                                                                                                                                                                                                                                                                                                                                                                                                                                                                                                                     |
| Keywords:                       | OCCUPATIONAL & INDUSTRIAL MEDICINE, REHABILITATION MEDICINE, PUBLIC HEALTH, QUALITATIVE RESEARCH                                                                                                                                                                                                                                                                                                                                                                                                                                                                                                                                                                                                                                                                  |
|                                 |                                                                                                                                                                                                                                                                                                                                                                                                                                                                                                                                                                                                                                                                                                                                                                   |

SCHOLARONE™  
Manuscripts



1  
2  
3  
4  
5 **TO WORK DESPITE CHRONIC HEALTH CONDITIONS- A QUALITATIVE STUDY OF WORKERS**  
6  
7 **AT THE SWEDISH EMPLOYMENT SERVICE**

8 Carina Hjartström<sup>1,2</sup>, Annika Lindahl Norberg<sup>1,3</sup>, Gun Johansson<sup>1,3</sup>, Theo Bodin<sup>1,3,\*</sup>  
9  
10

11 1 Unit of Occupational Medicine, Institute of Environmental Medicine, Karolinska Institutet,  
12 Stockholm, Sweden

13 2 Arbetsformedlingen, Department of Rehabilitation to Work, Västerås, Sweden

14 3 Center for Occupational and Environmental Medicine, Stockholm County Council, Stockholm,  
15 Sweden  
16

17  
18 Corresponding Author

19 Theo Bodin

20 Centrum för Arbets- och Miljömedicin

21 Solnavägen 4

22 SE-11364 Stockholm

23 SWEDEN

24 [theo.bodin@ki.se](mailto:theo.bodin@ki.se)

25 +46 739 79 25 72  
26

27  
28 Word count excluding abstract: 4835

29  
30 Suggested MeSH terms Workplace, Retirement, Motivation, Leadership, Sweden, Employment,

31  
32 Occupations, Chronic health condition, Work-Life Balance  
33  
34  
35  
36  
37  
38  
39  
40  
41  
42  
43  
44  
45  
46  
47  
48  
49  
50  
51  
52  
53  
54  
55  
56  
57  
58  
59  
60

## ABSTRACT

**Objectives:** Achieving a sustainable, healthy and long working life is key prerequisite for meeting the demographic challenge posed by an ageing population so that more people can work on into their later years. The objective of this study is to explore the relationship between work and chronic health conditions in a group of employees aged 50-64 with a focus on factors which enable them to continue to work. **Methods:** Ten white-collar workers with one or more chronic health conditions at the Swedish Public Employment Service participated in the study. A qualitative method with semi-structured in-depth interviews was used to collect data. **Results and Conclusions:** This study shows that factors enabling people with chronic health conditions to work include adaptation of the work situation by task-shifting as well as provision of physical aids. Our study suggest that the changes often come at the employee's initiative, hence, there is potential for greater involvement from the employer, healthcare agencies and the social insurance fund in making it easier for employees to adapt their work situation and in providing information regarding available support. It confirms findings in earlier studies that health plays an important part but also that self-confidence and motivation are significant factors contributing to workers being able and wanting to continue working.

**STRENGTHS AND LIMITATIONS OF THIS STUDY**

1. All participants in this study has been interviewed by a single person with long work experience in occupational health, especially rehabilitation.
2. It was evident that the study reached an acceptable saturation with regards to factors related to continuation of work and support needs.
3. The description of the study population includes detailed information including self-perceived health and workability index.
4. A limitation is that the invitation was sent by the employer and critical voices might have had second thought on participating.
5. Adherence to the COREQ guidelines has been implemented from the start in order to meet the quality standards for both publishing and inclusion in future reviews.

## BACKGROUND

Achieving a sustainable, healthy and long working life is key prerequisite for meeting the demographic challenge posed by an ageing population. By 2060, there will be only two people of working age (15-64 years) in the EU for every person over 65, compared to a ratio of 4-1 today. This will likely lead to a shortage in the labour force and could result in slower economic growth (1).

Sweden has one of the highest rates of employment in the world, including among older workers. In spite of this, 14 % of all employees between the ages of 50 and 64 say that, regardless of the state of their health, they do not think that they will be able to work until the normal retirement age (2).

Early retirement from work is a complex process which takes place over time and is dependent on numerous different circumstances at both a personal and society level, where health is one of the most important factors (3).

The number of people with chronic health conditions is rising. In Sweden, more than 650,000 people report that health conditions such as impaired hearing, chronic pain, impaired mobility, mental disabilities, cardiovascular conditions or allergies has a negative effect on their work ability. More than 60 % of those with disabilities without employment think they could perform a job if they were supported with some form of adaptations at work (4). A Dutch study has shown that work adaptations are associated with a decrease in sick leave but are estimated to be underutilized opportunities for people with chronic disease (5). Another study indicates that people with impaired health often end their working life earlier than desired (3,6,7). A systematic review indicates that factors which enable people with chronic musculoskeletal pain to stay at work are different kinds of work adjustment, improved ergonomics, social support at job etc, but the evidence is weak (8). People with chronic health conditions increase the risk of early retirement, this is quite clear, and probably the statistics are underestimated since not all are willing to tell about their health situation with their employer (9). But this also offers great potential in terms of promoting a better work environment, in a broad sense, for older employees with health problems. Because workers with chronic health conditions have been shown to experience more problems, obstacles and needs, the largest gain of

4



1  
2  
3 occupational intervention can be achieved in these workers (10). However, there are only a few  
4  
5 studies that are investigating factors in the work environment which plays a key role in encouraging  
6  
7 people with chronic health conditions to participate in the labour market. There is also a lack of  
8  
9 research into how workplaces can adapt to and meet the needs and requirements of employees with  
10  
11 chronic health conditions (3). Employers, also reports lack of knowledge about disability and possible  
12  
13 adaptations at work (11). In light of this, it would seem important to analyse the experience of people  
14  
15 with chronic ill-health conditions in terms of their working life and work environment, as well as  
16  
17 which factors enables them to continue work.  
18  
19

20  
21 The aim of this study is to explore the relationship between work and chronic ill-health in a group of  
22  
23 public sector employees with a focus on factors which enables them to continue to work.  
24  
25

## 26 27 **MATERIALS AND METHODS**

### 28 29 **Preparation of Manuscript**

30  
31 A COREQ checklist designed for qualitative studies, in-depth interviews and focus groups has been  
32  
33 used to ensure that all the components which should be included are described in the existing study  
34  
35 (12).  
36  
37

### 38 39 **Study population and recruitment**

40  
41 All the study participants worked for the Swedish Public Employment Service, which is a government  
42  
43 agency whose main task is to help match job-seekers with employers.  
44  
45

46  
47 An email invitation was sent via the employer to all staff in three offices during the period December  
48  
49 2016 – January 2017. An additional email was sent out with a reminder. Some offices mentioned the  
50  
51 study at workplace meetings and put the recruitment letter in the employees' mailboxes.  
52  
53  
54  
55  
56

1  
2  
3 The recruitment letter specified the following inclusion criteria: a) Permanent employee as an  
4 administrator at the Swedish Public Employment Service, b) Aged 50-64 and c) one or more chronic  
5 health conditions since at least one year back.  
6  
7  
8  
9

10 Those interested in participating in the study were requested to contact the studies first author via  
11 email or telephone. An assessment was made at the initial contact as to whether the specified  
12 selection criteria were met before a meeting was arranged for a face-to-face interview. The aim was  
13 to interview between 8 and 12 participants. The interviews took place between January and March  
14  
15  
16  
17  
18  
19  
20  
21  
22 2017.

### 23 **Interviews**

24 A qualitative method with semi-structured in-depth interviews was used to collect data. The  
25 interviews were conducted at the study participants' respective workplaces during working hours.  
26  
27 The study participants chose where and when the meeting would be held. One of the interviews was  
28 conducted via Skype. All interviews were conducted individually, with one interview per study  
29 participant. The interviews were conducted by the lead author, who is a woman, master's student  
30 and physiotherapist, with more than seven years' work experience in occupational rehabilitation.  
31  
32  
33  
34  
35  
36

37 The interviews lasted between 45 and 75 minutes. There were also a few minutes where the  
38 interviewer introduced herself, the study and its purpose, and also asked the participant to sign the  
39 consent form. The interviews ended with a summary by the interviewer. Field notes were not made  
40 during the interview.  
41  
42  
43  
44  
45

46 An interview guide approach was used for the interviews, appendix 1. The interview guide was  
47 designed by the study authors and was used in a pilot interview before data was collected.  
48  
49  
50

51 Furthermore, the interviews ended with four ratings scales relating to work ability, general state of  
52 health and motivation to work. The purpose of the rating scales was to give a fuller description of the  
53 study participants. The ratings were done at the end of the interviews to avoid interference with the  
54  
55  
56  
57  
58  
59  
60

1  
2  
3 interview. The following four questions were used to survey self-perceived work ability, motivation  
4 and health:

5  
6  
7 1) How would you assess your current work ability compared to when it was at its peak on a scale  
8 from 0 to 10? (0 = cannot work at all, 10 = work ability when it is/was at its peak) 2) Thinking about  
9 your health – do you think that you can still be doing your current job in two years? (No, I don't, I  
10 don't really know, Yes, I definitely will be). 3) How important is work to you on a scale from 1 to 10?  
11 (0 = not at all important, 10 = extremely important. 4) How would you assess your general state of  
12 health? (very good, good, reasonable, poor and very poor).  
13  
14  
15  
16  
17  
18  
19  
20

## 21 **Analysis**

22 The interviews were recorded, transcribed verbatim and coded by the lead author. Inductive  
23 thematic analysis was used for analysis (13). The entire analysis covered six phases: reading and re-  
24 reading the transcripts, initial coding, identifying subthemes and themes, reviewing the themes in  
25 relation to the coded data, defining and describing the themes, and finally producing a synthesis of  
26 the results in this paper. The analysis was inductive and the structure of the initial coding was guided  
27 by the study aim. Data extracts related to the subject matter were identified, condensed, and coded.  
28 Subsequently, codes were organised in preliminary themes. These were reviewed and revised in  
29 dialogue with the uncondensed interview data, emerging into a final theme structure. Due to the  
30 manageable amount of data, specific analysis software was not used, and instead MS Word table  
31 could be used to keep the structure of the analysis. The analysis was based on the study participants'  
32 manifest statements. The analysis was performed by the lead author, who throughout the analysis  
33 process discussed the coding and the themes with the co-authors. The rest of the research team  
34 comprises a doctor, sociologist and psychologist, who all hold PhDs. Transcriptions were not sent to  
35 the informants.  
36  
37  
38  
39  
40  
41  
42  
43  
44  
45  
46  
47  
48  
49  
50  
51  
52  
53  
54  
55  
56  
57  
58  
59  
60

1  
2  
3 Quotes from the study participants, which are presented in the results section, appear in italics. The  
4  
5 word order has sometimes been changed and they have been shortened to make them easier to  
6  
7 read. Some words have been removed to avoid identification.  
8  
9

### 10 **Ethical considerations**

11  
12 The study has been approved by the Regional Ethical Review Board in Stockholm, reference number  
13  
14 2016/2105-31/5.  
15

## 16 **RESULTS**

### 17 **Description of the study population**

18  
19 Ten employees from three different offices expressed an interest in the study. They all met specified  
20  
21 criteria and participated in the study. Informants' characteristics are summarized in table 1. The most  
22  
23 frequently occurring chronic health conditions were long-term pain conditions, hearing loss, state of  
24  
25 fatigue, as well as cardiovascular diseases. Four study participants had one condition, two persons  
26  
27 had two conditions and the remaining four had three or more. One person was on sick leave 25% of  
28  
29 the time. Current work ability, compared to when it was at its best was high (median = 8) for all  
30  
31 participants except one individual who indicated 2 on the scale from 0-10. In terms of forecasting  
32  
33 their work ability in two years from now, in light of their current state of health, seven out of ten  
34  
35 study participants reckoned they were sure that they could do their current job in two years if the  
36  
37 same circumstances applied. Most of them considered their general state of health to be fairly good  
38  
39 or acceptable, in spite of enduring restrictions for many years due to chronic health conditions. Work  
40  
41 was considered to be important in many respects by all the study participants.  
42  
43  
44  
45  
46  
47  
48  
49

50 Insert table 1 here  
51  
52

### 53 **General observations of factors related to continuation of work despite having a chronic** 54 **health condition**

55  
56  
57 8  
58  
59

1  
2  
3 The condensation of the interviewees produced 13 sub-themes which could further be grouped into 5  
4 main themes. The sub-themes and main themes are presented in table 2 and a detailed presentation  
5 of example quotes and condensations are found in table 1 in the Appendix. Almost all of the study  
6 participants reported different types of adaptations as important factors to enable continuation of  
7 work. In the cases when adaptations of work hadn't taken place for one reason or the other, this was  
8 perceived as a problem. Further, it was also evident that the adaptations that had taken place in  
9 most cases came at the informants' own initiative. Although the study participants who had  
10 informed their employer about their health condition experienced support, most participants had  
11 chosen not to tell the employer. Work was perceived to promote health and as a way to reduce the  
12 impact of the chronic condition on quality of life, contributing to social cohesion and sense of  
13 purpose.  
14  
15  
16  
17  
18  
19  
20  
21  
22  
23  
24  
25

26  
27 Insert table 2 here  
28

### 29 30 **Adaptation of work**

31 Physical adaptation/aid, such as an adapted chair, an adjustment made to a computer workstation or  
32 getting their own separate office were mentioned as significant and important requirements for  
33 coping with work by the participants who had received this type of support. Several study  
34 participants had the perception that their employer was generous with providing physical aids if they  
35 were asked to do so. *"There are no problems getting help. I've always had good gadgets, a suitable  
36 chair, a Mousetrapper mouse and other devices to help me at my workstation. I'm eternally grateful  
37 for this."* - participant number 6  
38  
39  
40  
41  
42  
43  
44  
45

46  
47 On the other hand, requests for aids were seldom made as they did not know what they should ask  
48 for, or they did not take the time to ask for it. As one of the respondents witnessed, the difficulty in  
49 getting an own office appeared to be a major obstacle to cope with work; *"I find it extremely hard to  
50 concentrate and take in what I'm doing when there are several of us in an office"* - participant number  
51  
52  
53  
54

55  
56 7

57  
58 9  
59

1  
2  
3 Modifications to work tasks resulted in fewer physical and mental demands. Examples of these  
4  
5 modifications included fewer, but more specialised tasks, less customer contact, greater opportunity  
6  
7 for own planning and, in some cases, less administration. Study participants who had adapted their  
8  
9 work tasks also found it contributing to a better work–life balance. A change in the approach to  
10  
11 work, based on work arrangements and suitable strategies, played a significant role in making work  
12  
13 easier. Strategies which emerged included reorganizing work through introduction of flexitime and  
14  
15 remote working as well as changing details such as varying posture while working and taking more  
16  
17 frequent breaks. Two of the participants summarize both changes in work content and organization:  
18  
19 *“I used to have greater responsibility in my job, but I felt that it got too much for me. I needed to*  
20  
21 *change the tasks I did for the good of my health. This means that what works for me now is less*  
22  
23 *responsibility, flexitime and I can manage my time better. I now enjoy my job too!”* - participant  
24  
25 number 3 *“I don’t need to go off sick. If my work allows it, I can work flexitime and go home earlier*  
26  
27 *that day to rest. And I can now also plan my new work tasks better.”* participant number 10  
28  
29

30  
31 Although the participants found their employers to be supportive in general, there was sometimes  
32  
33 no sense of urgency or well-established routines to go about changing work. One participant said  
34  
35 that the process of getting adaptations made to both equipment and tasks was both complicated,  
36  
37 time-consuming and aggravating the health condition: *“I would have avoided a great deal of*  
38  
39 *stomach-ache if it hadn’t been so complicated. Because there is actually mental stress involved as*  
40  
41 *well. The whole thing took a good year. If it had gone a bit more quickly, I might have perhaps been in*  
42  
43 *a better state than I am now.”*- participant number 4  
44  
45

#### 46 47 **Life style**

48  
49 Physical activity and achieving work-life balance seemed to be important elements in terms of coping  
50  
51 better with work increased well-being and maintained work ability. Work-life imbalance had  
52  
53 prompted participants to make changes both at work and at home. Reducing working time, changing  
54  
55 work content to both less demanding tasks and a decrease in amount of work were all ways of  
56

57  
58  
59  
60  
10

1  
2  
3 attaining a better work-life balance. At home, some of the participants contemplated to hire a maid  
4  
5 in order to be able to keep working. However, in one case, combining continued work at the agency  
6  
7 and having a personal life seemed to be utopian: *"If I could modify my current work more, I think I*  
8  
9 *can work at 67, because I think the job is fun. Now I just feel I'm working, going home, sitting and*  
10  
11 *doing nothing and then I'm going to bed. I have no energy to train or invite friends, I can't even think*  
12  
13 *of it. But I've actually searched for another job, [laughing], I'm 63 years old and have searched for*  
14  
15 *another job!"* - participant number 9  
16  
17

18  
19 The end of the quote above illustrates how the notion of being old and sick limits one's options in  
20  
21 attaining work-life balance. The only resolve for some seemed to reach retirement age through part-  
22  
23 time work. *"I'll be 63 soon. I have just started thinking about changing my work situation, maybe*  
24  
25 *decrease working hours. I have not thought so before, but now the work takes so much energy and*  
26  
27 *removes so much from my private life. I have no energy for my grandchildren nor my home, that's*  
28  
29 *how it is."* – participant number 2  
30  
31

32  
33 Physical activity and leisure activities were seen by many as ways to improve their health, both  
34  
35 physical and mental, thereby enabling them to cope with work better. Leisure activity was a way of  
36  
37 recharging the batteries and relaxing mentally, which seemed to be especially important for jobs  
38  
39 involving a high level of mental stress. Conversely, in those cases where participants could not do any  
40  
41 physical activity, they felt it contributed to a deterioration in their condition: *"One thing that's*  
42  
43 *extremely important is that if I don't move about, I feel worse. A gym class and yoga are very*  
44  
45 *important, just as important as the medication I take."* - participant number 10  
46  
47

### 48 **Confidence in one's own abilities**

49

50  
51 Confidence was reflected in the study participants' own view of their condition, their acceptance of it  
52  
53 and of a notion that they could influence their situation.  
54  
55  
56

1  
2  
3 Acceptance of the state of their health was prominent among the interviewees. In spite of the  
4  
5 restrictions which the disease entailed, most of them voiced the attitude "when life gives you lemons  
6  
7 you make lemonade" and that their situation could have been worse. As one participant said: *"I'm*  
8  
9 *almost constantly in pain, but you still learn to live with it somehow."* - participant number 9

10  
11  
12 Confidence in their own ability was perceived to be high, in spite of the tough conditions they  
13  
14 endured, as one study participant put it: *"I couldn't keep doing the job I was doing then, when I was*  
15  
16 *very ill, but when I got better, I wanted this job 100% and everyone said that I was mad... But I said*  
17  
18 *that it was maybe something that I could definitely do. Otherwise, I might as well stop."* - participant  
19  
20 number 7

21  
22  
23 Perceived decision latitude, in terms of the ability to change their work environment and work  
24  
25 situation was a common feature. Overall, everyone felt that they could influence their situation in  
26  
27 some way, if they wanted: *"If there's something wrong, I fix it. I don't just sit there and wait for*  
28  
29 *someone else to do something."* - participant number 1

### 30 31 32 33 **Motivation**

34  
35 Even though some participants encountered major difficulties due to their condition, they expressed  
36  
37 a strong motivation to work and find solutions enabling them to continue their working life.

38  
39 Intellectual stimulus, meaning interesting, varied and challenging work tasks was regarded as  
40  
41 important motivational factors. *"I'm lucky that I think I've got a job that I enjoy and find interesting.*  
42  
43 *Otherwise, I would have gone home a long time ago and gone on sick leave."* - participant number 4

44  
45 Just as important motivational factor was the social dimension of work: *"The job is extremely*  
46  
47 *important. That's all there is to it. It's particularly important since I can enjoy the social aspect and be*  
48  
49 *stimulated. It definitely means that I enjoy it a great deal."* - participant number 7 Thirdly, a sense of  
50  
51 purpose and perceptions that the work they did benefited other people in difficult situations added  
52  
53 to motivation and work satisfaction: *"... apart from working to pay for food and rent, work is*  
54  
55



1  
2  
3 *definitely a major driving force for the social side of things, allowing you to feel that you can make a*  
4  
5 *difference.” - participant number 8*  
6  
7

### 8 **Supporting structures**

9

10 Three supporting structures were identified during as especially important to enable work despite a  
11 chronic health condition. These were support from superior, support from healthcare agencies and  
12 support from the social insurance fund.  
13  
14

15  
16  
17 Support from superiors was in most cases initiated only after the participant had made such a  
18 demand. The support consisted of organizing work and help with task shifting. Support from the  
19 company’s occupational health care provider was usually initiated by the employer and could include  
20 workplace interventions and a long-term rehabilitation plan. Study participants said that this support  
21 contributed to peace of mind, reduced anxiety and meant less time off sick. *“It was the prompt*  
22 *support I got from my boss and the company’s healthcare team. I would say that it was completely*  
23 *down to the help I got and my own attitude that I could go back to work.” - participant number 6*  
24  
25  
26  
27  
28  
29  
30  
31

32  
33 Support from healthcare, which included different healthcare agencies, such as primary care,  
34 specialists and the occupational health care providers. Suitable medical and behavioural treatment,  
35 guided physical activity, physical treatment, knowledge of self-care and individual training, assistance  
36 with getting their own office and, to a certain degree, advice about job scope were some of the  
37 forms of support provided. Support from the healthcare agencies was considered to be just as vital  
38 for those who had received it as it was perceived as a major loss for those did had not. Some said  
39 that the company’s occupational health care provider was hard to access and there was uncertainty  
40 regarding which type of support they could give. Others mentioned the contribution made by the  
41 company’s healthcare team, with support for a change in behaviour in relation to achieving an  
42 activity balance. The participants said that contact with the regular health-care system was a private  
43 thing and cooperation with other supporting structures did not occur.  
44  
45  
46  
47  
48  
49  
50  
51  
52  
53  
54  
55  
56

1  
2  
3  
4  
5  
6 Support from the social insurance fund, in cooperation with the employer, seemed to some study  
7  
8 participants to be a success factor in terms of finding a sustainable work situation. The cooperation  
9  
10 was usually initiated by the insurance fund, but also by the employee. The support measures  
11  
12 implemented were a long-term rehabilitation plan, work training, an opportunity to try out new work  
13  
14 tasks and a gradual increase in working hours as the study participants' well-being improved. This  
15  
16 helped these study participants to find a sustainable solution and achieve a balance in their working  
17  
18 hours and tasks. One interviewee with recurring depression, for whom gradual return-to-work was  
19  
20 incremental for success said that *"One of the best sources of support came from the social insurance*  
21  
22 *fund and my employer, who didn't push too hard."* - participant number 10  
23  
24  
25  
26

## 27 **DISCUSSION**

28  
29 The analysis process highlighted five main themes which influencing the continuation of the study  
30  
31 participant's work-life, even when suffering from chronic health conditions. Major emphasis has  
32  
33 been placed on describing factors which enable rather than hindering work. The study's results show  
34  
35 with good consensus that factors enabling people to continue work while suffering a chronic health  
36  
37 condition include adapting the work situation by complete or partial task-shifting, provision of  
38  
39 physical aids. Other important factors are adaptation of individual behaviour related to work and  
40  
41 personal life. We also found that the study participants' view of their condition, their confidence in  
42  
43 their own ability and motivation to work also were significant factors contributing to both wanting  
44  
45 and being able to work. In this study, all participants felt that they could ( if they wanted to) influence  
46  
47 both their work situation and work environment to a certain degree, a finding that highlights the  
48  
49 importance of agency and decision latitude.. Our findings are in line with the review by Loisel et al.  
50  
51 (2005), who found that the same factors are important in return-to-work and prevention of disability  
52  
53 due to musculoskeletal disorders (14). There are few studies on retention of older workers with  
54  
55  
56

1  
2  
3 chronic disease at work (15) and the the main contribution of our study is that it, reassuringly  
4  
5 enough, indicates that the same factors are in play for “return-to-work” as “stay-at-work” for  
6  
7 employees with chronic disease.  
8  
9

10 Adaptation measures in the workplace offer relevant support with a positive impact on work ability  
11  
12 (16,17). Employers are required by law to adapt working conditions to individuals’ different physical  
13  
14 and mental requirements (18). Possible reasons for failing to or delaying adaptations are frequent  
15  
16 changes in management, ignorance of the issue among employers or study participants deciding not  
17  
18 to mention any support requirements. Norstedt (2016) highlights difficulties which people who have  
19  
20 hidden functional impairments have about mentioning this in their workplaces as their perceptions  
21  
22 are that it can result in adverse consequences (19). Other studies have suggested that dialogue  
23  
24 between the employer and employee and tailored work-related interventions may be helpful (7).  
25  
26 This is confirmed in this study where the study participants who decided to talk to their employer  
27  
28 about this matter have perceived that they have received good adaptations and support.  
29  
30

31  
32 Lifestyle factors, such as physical activity and other leisure activities as well as behavioural changes in  
33  
34 order to attain a good work-life balance seemed to play a significant role. Physical activity in  
35  
36 particular seemed to be a strong contributory factor in preventing further deteriorating of the  
37  
38 participants’ health, thereby improving their work ability, which tallies with the findings from other  
39  
40 research studies (20).  
41  
42

43 Confidence in one’s own ability, often labled “self-efficacy” or “coping”, plays an important role in  
44  
45 how individuals handle specific situations and is a determinant of their ability to influence their  
46  
47 situation (21). The group of informants in the present study held a pragmatic view of their options in  
48  
49 life and generally showed broad acceptance of their situation and a high level of confidence in their  
50  
51 own ability. From an outsider’s perspective, their health status did not seem to correlate with their  
52  
53 perceived health or their self-reported work ability, highlighting the importance of a holistic  
54  
55

1  
2  
3 approach tailored for the individual in order to retain workers with chronic disease while also  
4  
5 maintaining productivity as proposed in previous research by others (15). Confidence in their own  
6  
7 ability could also have been reinforced by the generally high level of decision latitude, which is well  
8  
9 known to be associated to a lower risk of sick leave (22,23). It also aligns well with findings that  
10  
11 expanded job control could be an important way to counteract the negative effects on work  
12  
13 performance because of decreased work ability (24).  
14  
15

16 Work motivation was high for all respondents, irrespective of health status. Although factors outside  
17  
18 the workplace are important, our results suggest that it should be possible to develop and evaluate  
19  
20 interventions aimed at maintaining work motivation, especially intellectual stimulation, social  
21  
22 cohesion and sense of purpose. It seems important to help workers to maintain and cultivate a sense  
23  
24 of coherence (25) at the workplace- where comprehensibility, manageability, and meaningfulness  
25  
26 can contribute to the individual's health. In order to adapt work and maintain good social work  
27  
28 environment, support, especially from superiors who contribute to creating opportunities for a  
29  
30 longer working life and have a positive impact on workers health (26,27). Some participant had  
31  
32 received support from their superior in different ways, including finding suitable work tasks and  
33  
34 adapting the way of working. Study participants who additionally received support from the  
35  
36 healthcare team and social insurance fund acknowledged that this was a further boosting factor.  
37  
38 These results are in line with findings by others, that employers who adopt a structured approach to  
39  
40 rehabilitation, cooperate with other agencies and have strong leadership functions have healthier  
41  
42 employees (28). The study participants felt a general lack of support from the healthcare agencies,  
43  
44 which is common among people with a chronic health condition (29). National guidelines indicate the  
45  
46 importance of the support provided by healthcare agencies in terms of rehabilitation by offering  
47  
48 continuous, coordinated care to people with a chronic health condition of working age, enabling  
49  
50 them to cope with working life (30). Varekamp et al. (2006) also highlight the importance of the  
51  
52 overlap between the provision of healthcare and rehabilitation geared towards working life (31).  
53  
54  
55  
56

### Strengths and limitations

The trustworthiness of our study is primarily established through the credibility of the research methods we applied (32). The choice of semi-structured, in-depth interviews was to give greater scope for individuals to talk about their experiences and thoughts. It is regarded as a flexible and tried-and-trusted method for gathering data in the field of healthcare research (33). Interviews was held by the same author to ensure the same procedure. No field notes were taking during the interviews, to enable an active and attentively listening. Those were important steps to avoid self-understanding and interpretation and to achieve credibility in the findings. The study author's experience of working in the field of work-related rehabilitation and of working for the same employer as the study participants is mainly considered to be a strength as it made iterative questioning possible, i.e. ask follow-up questions and go into greater depth on various questions.

A limitation, both with regards to establishing credibility and transferability is that this study is limited to a small number of participants and a single employer. Aspects of work and chronic disease that could be present among employees in e.g. private sector or manual work have not been investigated in this study. In spite of the small numbers, the data material gathered is considered to have achieved saturation, based on the study's questions. This was indicated by a large level of consensus and recurrently similar answers within the question areas. This was true in spite of different genders, professional categories and workplaces featuring in the study. Although the results should be interpreted with caution, they are consistent with previous research (3,5,7,8,14,31). The dependability and confirmability of this study was assured through close adhesion to COREQ guidelines (12) and detailed reporting of methodology in order to enable the reader to make a critical appraisal of our study.

### CONCLUSIONS

1  
2  
3 This study found that factors enabling workers with chronic health conditions to work include early  
4 adaptation of the work situation through task shifting as well as provision of physical aids. Our study  
5 suggest that the changes are likely to come at the employee's initiative, hence, there is untapped  
6 potential for greater cooperation involving the employer, healthcare agencies and the social  
7 insurance fund in providing information regarding available support and interventions tailored to suit  
8 the individual. This study also suggests that there is need to deliver interventions more timely than  
9 today and involve several actors from the beginning in order to be successful. It confirms findings in  
10 earlier studies that health plays an important part but also that self-efficacy and motivation are  
11 significant factors contributing to workers being able and wanting to continue working.  
12  
13  
14  
15  
16  
17  
18  
19  
20  
21  
22  
23

#### 24 **ACKNOWLEDGEMENTS**

25 I would like to sincerely thank all the study participants who took the time to take part and talk about  
26 their experiences. I hope that I have done justice to the information you provided. I would also like to  
27 thank the employers for agreeing to participate and to those who helped with sending out the study  
28 invitations.  
29  
30  
31  
32  
33  
34  
35  
36

#### 37 **CONTRIBUTORSHIP STATEMENT**

38 The study was conceived by Carina Hjartström and Theo Bodin. The study protocol was developed by  
39 Carina Hjartström, Annika Lindahl Norberg and Theo Bodin. The interviews were recorded,  
40 transcribed verbatim by Carina Hjartström, and analysed by Carina Hjartström under supervision  
41 from Annika Lindahl Norberg. The interpretation of the findings was done by Carina Hjartström,  
42 Annika Lindahl Norberg, Gun Johansson and Theo Bodin. The first draft of the manuscript was done  
43 by Carina Hjartström. All subsequent drafts were commented upon and revised by all authors. The  
44 submitted version of the manuscript was approved by all authors.  
45  
46  
47  
48  
49  
50  
51  
52  
53  
54

#### 55 **COMPETING INTERESTS**

56  
57 18  
58  
59  
60

1  
2  
3 Carina Hjartström works at the Swedish Public Employment Service. The employer was not involved  
4  
5 in designing and analysing the study and had no influence over the study's conclusions. The other  
6  
7 authors state that they have no conflicts of interest or objections.  
8  
9  
10

## 11 **FUNDING**

12 This Study was supported by the Swedish Research Council for Health, Working Life and Welfare,  
13  
14

15 FORTE  
16  
17  
18  
19

## 20 **DATA SHARING STATEMENT**

21 This study does not include any data that could be shared  
22  
23  
24  
25  
26  
27  
28  
29  
30  
31  
32  
33  
34  
35  
36  
37  
38  
39  
40  
41  
42  
43  
44  
45  
46  
47  
48  
49  
50  
51  
52  
53  
54  
55  
56  
57  
58  
59  
60

**References:**

1. de Jong PR. Sickness, disability and work: breaking the barriers—a synthesis of findings across OECD countries—by OECD. *Int Soc Secur Rev.* 2011;64(3):103–4.
2. Arbetsmiljöverket. The work environment 2013. 2014;(2014:3).
3. Hasselhorn HM, Apt W. Understanding employment participation of older workers: Creating a knowledge base for future labour market challenges. Berlin; 2015.
4. Sverige, Statistiska centralbyrån. Situationen på arbetsmarknaden för personer med funktionsnedsättning 2015 / The labour market situation for people with disabilities 2015 / Statistics Sweden. Stockholm: Statistiska centralbyrån (SCB); 2016.
5. Boot CR, van den Heuvel SG, Bültmann U, de Boer AG, Koppes LL, van der Beek AJ. Work adjustments in a representative sample of employees with a chronic disease in the Netherlands. *J Occup Rehabil.* 2013;23(2):200–8.
6. Solem PE, Syse A, Furunes T, Mykletun RJ, De Lange A, Schaufeli W, et al. To leave or not to leave: retirement intentions and retirement behaviour. *Ageing Soc.* 2016;36(2):259–81.
7. De Wind A, Geuskens GA, Reeuwijk KG, Westerman MJ, Ybema JF, Burdorf A, et al. Pathways through which health influences early retirement: a qualitative study. *BMC Public Health.* 2013;13(1):292.
8. de Vries HJ, Reneman MF, Groothoff JW, Geertzen JH, Brouwer S. Factors promoting staying at work in people with chronic nonspecific musculoskeletal pain: a systematic review. *Disabil Rehabil.* 2012;34(6):443–58.
9. de Jong M, de Boer AG, Tamminga SJ, Frings-Dresen MH. Quality of working life issues



- 1  
2  
3 of employees with a chronic physical disease: a systematic review. *J Occup Rehabil.* 2015  
4  
5 Mar;25(1):182–96.  
6  
7  
8 10. Koolhaas W, van der Klink JIL, Vervoort JPM, de Boer MR, Brouwer S, Groothoff JW. In-  
9  
10 depth study of the workers' perspectives to enhance sustainable working life: comparison between  
11  
12 workers with and without a chronic health condition. *J Occup Rehabil.* 2013 Jun;23(2):170–9.  
13  
14  
15 11. Kaye H, Jans L, Jones E. Why Don't Employers Hire and Retain Workers with  
16  
17 Disabilities? *J Occup Rehabil.* 2011;21(4):526–36.  
18  
19  
20 12. Tong A, Sainsbury P, Craig J. Consolidated criteria for reporting qualitative research  
21  
22 (COREQ): a 32- item checklist for interviews and focus groups. *Int J Qual Health Care.*  
23  
24 2007;19(6):349–57.  
25  
26  
27 13. Braun V, Clarke V. Using thematic analysis in psychology. *Qual Res Psychol.*  
28  
29 2006;3(2):77–101.  
30  
31  
32 14. Loisel P, Buchbinder R, Hazard R, Keller R, Scheel I, Van Tulder M, et al. Prevention of  
33  
34 work disability due to musculoskeletal disorders: the challenge of implementing evidence. *J Occup*  
35  
36 *Rehabil.* 2005;15(4):507–24.  
37  
38  
39 15. Leijten F, van den Heuvel S, Geuskens G, Ybema JF, de Wind A, Burdorf A, et al. How  
40  
41 do older employees with health problems remain productive at work?: a qualitative study. *J Occup*  
42  
43 *Rehabil.* 2013;23(1):115–24.  
44  
45  
46 16. Franche R-L, Cullen K, Clarke J, Irvin E, Sinclair S, Frank J. Workplace- Based Return-to-  
47  
48 Work Interventions: A Systematic Review of the Quantitative Literature. *J Occup Rehabil.*  
49  
50 2005;15(4):607–31.  
51  
52  
53 17. Vooijs M, Leensen MC, Hoving JL, Wind H, Frings-Dresen MH. Interventions to enhance  
54  
55  
56  
57 21

- 1  
2  
3 work participation of workers with a chronic disease: a systematic review of reviews. *Occup Env*  
4  
5 *Med.* 2015 Nov;72(11):820–6.  
6  
7  
8 18. Arbetsmiljöverket. *Arbetsanpassning och rehabilitering AFS 1994:1.* Stockholm:  
9 Arbetsmiljöverket; 1994.  
10  
11  
12  
13 19. Norstedt M. Att avslöja sina dolda funktionsnedsättningar i arbetslivet. *Arbetsmarknad*  
14 *Arbetsliv.* 2016;22(2):36–48.  
15  
16  
17  
18 20. Arvidson E, Börjesson M, Ahlborg G, Lindegård A, Jonsdottir IH. The level of leisure  
19 time physical activity is associated with work ability—a cross sectional and prospective study of health  
20 care workers. *BMC Public Health.* 2013;13(1):855.  
21  
22  
23  
24  
25  
26 21. Dehlin O, Hagberg B. Inte hur man har det utan hur man tar det. *Läkartidningen.*  
27 2000;97(5):430–3.  
28  
29  
30  
31 22. Johansson G, Lundberg I. Adjustment latitude and attendance requirements as  
32 determinants of sickness absence or attendance. Empirical tests of the illness flexibility model. *Soc*  
33 *Sci Med.* 2004;58(10):1857–68.  
34  
35  
36  
37  
38 23. Leijten FRM, de Wind A, van den Heuvel SG, Ybema JF, van der Beek AJ, Robroek SJW,  
39 et al. The influence of chronic health problems and work-related factors on loss of paid employment  
40 among older workers. *J Epidemiol Community Health.* 2015;69(11):1058–65.  
41  
42  
43  
44  
45  
46 24. van den Berg TI, Robroek SJ, Plat JF, Koopmanschap MA, Burdorf A. The importance of  
47 job control for workers with decreased work ability to remain productive at work. *Int Arch Occup*  
48 *Environ Health.* 2011 Aug 1;84(6):705–12.  
49  
50  
51  
52  
53 25. Antonovsky A. *Unraveling the mystery of health: How people manage stress and stay*  
54 *well.* Jossey-Bass; 1987.  
55  
56  
57 22  
58  
59  
60

- 1  
2  
3 26. Krause N, Lynch J, Kaplan GA, Cohen RD, Goldberg DE, Salonen JT. Predictors of  
4 disability retirement. *Scand J Work Env Health*. 1997;23(6):403–13.  
5  
6  
7  
8 27. Searle B, Bright JEH, Bochner S. Helping people to sort it out: The role of social support  
9 in the Job Strain Model. *Work Stress*. 2001;15(4):328–46.  
10  
11  
12  
13 28. Svartengren M, Stoetzer U, Parmasund M, Eriksson T, Stöllman Å, Vingård E. Hälsa och  
14 framtid i kommuner och landsting. Stockholm; 2013.  
15  
16  
17  
18 29. Socialstyrelsen. Hälsa- och sjukvård vid kroniska sjukdomar. Socialstyrelsen; 2015.  
19  
20  
21 30. Government of Sweden. Nationell strategi för att förebygga och behandla kroniska  
22 sjukdomar : 2014-2017. Stockholm: Socialdepartementet, Regeringskansliet; 2014.  
23  
24  
25  
26 31. Varekamp I, Verbeek JH, van Dijk FJ. How can we help employees with chronic  
27 diseases to stay at work? A review of interventions aimed at job retention and based on an  
28 empowerment perspective. *Int Arch Occup Env Health*. 2006 Nov;80(2):87–97.  
29  
30  
31  
32  
33 32. Shenton AK. Strategies for ensuring trustworthiness in qualitative research projects.  
34 *Educ Inf*. 2004;22(2):63–75.  
35  
36  
37  
38 33. Diccio-Bloom B, Crabtree BF. The qualitative research interview. *Med Educ*.  
39 2006;40(4):314–21.  
40  
41  
42  
43  
44  
45  
46  
47  
48  
49  
50  
51  
52  
53  
54  
55  
56

**Table 1.** Background information and characteristics of informants (n=10).

|                                                            |                         |              |
|------------------------------------------------------------|-------------------------|--------------|
| <b>Sex</b>                                                 | Men                     | 2            |
|                                                            | Women                   | 8            |
| <b>Age</b>                                                 | Median (range)          | 59,5 (51-63) |
| <b>Educational level</b>                                   | High-school or lower    | 4            |
|                                                            | University              | 6            |
| <b>Health status</b>                                       | Very poor               | 0            |
|                                                            | Poor                    | 0            |
|                                                            | Reasonable              | 5            |
|                                                            | Good                    | 5            |
|                                                            | Very good               | 0            |
| <b>Years with chronic health condition</b>                 | > 5 years               | 2            |
|                                                            | > 10 years              | 8            |
| <b>Most common chronic health conditions</b>               | Chronic pain condition  |              |
|                                                            | Hearing loss            |              |
|                                                            | Burnout/chronic fatigue |              |
|                                                            | Cardiovascular disease  |              |
| <b>Employment activity</b>                                 | Part-time               | 3            |
|                                                            | Fulltime                | 7            |
| <b>Years at current employer</b>                           | 8 – 30 years            |              |
| <b>Importance of work (1-10)</b>                           | Median (range)          | 8(5-9)       |
| <b>Work ability (0-10)</b>                                 | Median (range)          | 8 (2-9)      |
| <b>Will be working at the same job in 2 years from now</b> | No                      | 0            |
|                                                            | Don't know              | 3            |
|                                                            | Yes, definitely         | 7            |

**Table 2.** Thematic analysis of factors enabling work despite chronic health conditions

| Sub-theme                                                                             | Main theme                        |
|---------------------------------------------------------------------------------------|-----------------------------------|
| Physical adaptation/aid<br>Modifications to work tasks<br>Changes in approach to work | Adaptation                        |
| Work-life balance<br>Physical activity                                                | Life-style                        |
| Acceptance<br>Decision latitude                                                       | Confidence in one's own abilities |
| Intellectual stimulus<br>Social cohesion<br>Sense of purpose                          | Motivation                        |
| Superiors<br>Healthcare<br>Social security                                            | Support from others               |

## Appendix

### Interview guide

#### Background questions before interview

- Age
- Sex
- Professional title
- Length of education
- Duration of working hours
- Employed since year
- Diagnosis
- Debut year of disease

#### Semi-structured interview

1. Describe how a typical day at work looks like for you?
2. How does your health affect your work today?
3. What is it that makes it possible to work today?
4. Does your employer and colleagues know about your health situation?
5. Do you have or have you had any adjustment or support at work and in such cases what?
6. Do you miss any support today?
7. Do you see any need for support later on and in such cases what?
8. Do you feel that you can influence your work environment vs work situation?
9. How do you look at the opportunities for a long professional life?

#### Background questions after the interview

- Individual conditions/family situation
- Financial/economic incentives
- Healthcare contacts
- Sickness benefit

- 1  
2  
3  
4  
5  
6  
7  
8  
9  
10  
11  
12  
13  
14  
15  
16  
17  
18  
19  
20  
21  
22  
23  
24  
25  
26  
27  
28  
29  
30  
31  
32  
33  
34  
35  
36  
37  
38  
39  
40  
41  
42  
43  
44  
45  
46  
47  
48  
49  
50  
51  
52  
53  
54  
55  
56  
57  
58  
59  
60
- How would you assess your general state of health?
    - Very good
    - Good
    - Reasonable
    - Poor
    - Very poor
  - How important is work to you on a scale from 1-10?
    - 10 point VAS scale
      - 0 = not at all important
      - 10 = extremely important)
  - Thinking about your health - do you think that you can still be doing your current job in two years?
    - No, I don't
    - I don't really know
    - Yes, I definitely will be
  - Current work ability compared with lifetime best on a scale from 0 to 10?"
    - 10 point VAS scale
      - 0= Cannot work at all
      - 10=Work ability at lifetime best

**Table I.** Thematic analysis of factors enabling work despite chronic health conditions

| Quotes from study participants                                                                                                                                                                                                                                                                                                                                                                                                                                                                                                                                                                                                                                                                                                                                                                                                                                                   | Condensation                                                                                                                                                 | Sub-theme                   | Main theme        |
|----------------------------------------------------------------------------------------------------------------------------------------------------------------------------------------------------------------------------------------------------------------------------------------------------------------------------------------------------------------------------------------------------------------------------------------------------------------------------------------------------------------------------------------------------------------------------------------------------------------------------------------------------------------------------------------------------------------------------------------------------------------------------------------------------------------------------------------------------------------------------------|--------------------------------------------------------------------------------------------------------------------------------------------------------------|-----------------------------|-------------------|
| <p><i>"There are no problems getting help. I've always had good gadgets, a suitable chair, a Mousetrapper mouse and other devices to help me at my workstation. I'm eternally grateful for this."</i> - participant number 6</p> <p><i>"I find it extremely hard to concentrate and take in what I'm doing when there are several of us in an office"</i> - participant number 7</p>                                                                                                                                                                                                                                                                                                                                                                                                                                                                                             | <p>No problems getting help when asking</p> <p>Problem to work undisturbed</p>                                                                               | Physical adaptation/aid     | <b>Adaptation</b> |
| <p><i>"I would have avoided a great deal of stomach-ache if it hadn't been so complicated. Because there is actually mental stress involved as well. The whole thing took a good year. If it had gone a bit more quickly, I might have perhaps been in a better state than I am now."</i> - participant number 4</p> <p><i>And I have a good boss who has been keen to find suitable tasks for me to do. My bosses have actually shown that they want things to work for me during the years that I've got left."</i> - participant number 10</p> <p><i>"I used to have greater responsibility in my job, but I felt that it got too much for me. I needed to change the tasks I did for the good of my health. This means that what works for me now is less responsibility, flexitime and I can manage my time better. I now enjoy my job too!"</i> - participant number 3</p> | <p>Modification, wish to get earlier</p> <p>New tasks – possibility for longer working life</p> <p>More flexibility, less responsibility, manage better</p>  | Modifications to work tasks |                   |
| <p><i>"I don't need to go off sick. If my work allows it, I can work flexitime and go home earlier that day to rest. And I can now also plan my new work tasks better."</i> participant number 10</p>                                                                                                                                                                                                                                                                                                                                                                                                                                                                                                                                                                                                                                                                            | Planning/own strategies reduces sick leave                                                                                                                   | Changes in approach to work |                   |
| <p><i>"When I'm doing my hobby and producing something with my hands, it's a way for me to get rid of everything – clear my memory somehow, as it were."</i> - participant number 1</p> <p><i>"Then, when I was given other work tasks to do I gained a better balance. I can do things in my spare time like go to the gym and do other nice things."</i> - participant number 10</p> <p><i>"If I could modify my current work more, I think I can work at 67, because I think the job is fun. Now I just feel I'm working, going home, sitting and doing nothing and"</i></p>                                                                                                                                                                                                                                                                                                  | <p>Spare time activities reduces mental stress</p> <p>Modifications to work tasks benefits private life</p> <p>Desire for more possibilities/adjustments</p> | Work-life balance           | <b>Life-style</b> |



|                                                                                                                                                                                                                                                                                                                                                                                                                                                                                                                                                                                                                                                                                                                                                                                    |                                                               |                              |                                                 |
|------------------------------------------------------------------------------------------------------------------------------------------------------------------------------------------------------------------------------------------------------------------------------------------------------------------------------------------------------------------------------------------------------------------------------------------------------------------------------------------------------------------------------------------------------------------------------------------------------------------------------------------------------------------------------------------------------------------------------------------------------------------------------------|---------------------------------------------------------------|------------------------------|-------------------------------------------------|
| <p>then I'm going to bed. I have no energy to train or invite friends, I can't even think of it. But I've actually searched for another job, [laughing], I'm 63 years old and have searched for another job! - participant number 9</p> <p>I'll be 63 soon. I have just started thinking about changing my work situation, maybe decrease working hours. I have not thought so before, but now the work takes so much energy and removes so much from my private life. I have no energy for my grandchildren nor my home, that's how it is</p> <p>"It's a health benefit to go to work, despite bad health. I am soon getting cleaning service at home, because I can't do it myself, it is an adjustment at home so I've got energy for work instead." - participant number 1</p> | <p>Unbalance work/leisure time</p> <p>Adjustments at home</p> |                              |                                                 |
| <p>"One thing that's extremely important is that if I don't move about, I feel worse. A gym class and yoga are very important, just as important as the medication I take." - participant number 10</p>                                                                                                                                                                                                                                                                                                                                                                                                                                                                                                                                                                            | <p>Time and energy for training/rehabilitation</p>            | <p>Physical activity</p>     |                                                 |
| <p>"I'm almost constantly in pain, but you still learn to live with it somehow." - participant number 9</p> <p>"I couldn't keep doing the job I was doing then, when I was very ill, but when I got better, I wanted this job 100% and everyone said that I was mad... But I said that it was maybe something that I could definitely do. Otherwise, I might as well stop." - participant number 7</p>                                                                                                                                                                                                                                                                                                                                                                             | <p>Learn to live with pain</p> <p>Believe in own ability</p>  | <p>Acceptance</p>            | <p><b>Confidence in one's own abilities</b></p> |
| <p>"If there's something wrong, I fix it. I don't just sit there and wait for someone else to do something." - participant number 1</p>                                                                                                                                                                                                                                                                                                                                                                                                                                                                                                                                                                                                                                            | <p>Can influence and control</p>                              | <p>Decision latitude</p>     |                                                 |
| <p>"I'm lucky that I think I've got a job that I enjoy and find interesting. Otherwise, I would have gone home a long time ago and gone on sick leave." - participant number 4</p>                                                                                                                                                                                                                                                                                                                                                                                                                                                                                                                                                                                                 | <p>Work interesting</p>                                       | <p>Intellectual stimulus</p> | <p><b>Motivation</b></p>                        |
| <p>"The job is extremely important. That's all there is to it. It's particularly important since I can enjoy the social aspect and be stimulated. It definitely means that I enjoy it a great deal." - participant number 7</p>                                                                                                                                                                                                                                                                                                                                                                                                                                                                                                                                                    | <p>Colleagues important</p>                                   | <p>Social cohesion</p>       |                                                 |
| <p>"... apart from working to pay for food and rent, work is definitely a major driving force for the social side of things, allowing you to feel that you can make a difference." - participant number 8</p>                                                                                                                                                                                                                                                                                                                                                                                                                                                                                                                                                                      | <p>Meaningful, can make a difference</p>                      | <p>Sense of purpose</p>      |                                                 |

|                                                                                                                                                                                                                                                                                                                                                                                                                                                                                                                                                                |                                                  |                        |                                   |
|----------------------------------------------------------------------------------------------------------------------------------------------------------------------------------------------------------------------------------------------------------------------------------------------------------------------------------------------------------------------------------------------------------------------------------------------------------------------------------------------------------------------------------------------------------------|--------------------------------------------------|------------------------|-----------------------------------|
| <p>1<br/>2<br/>3<br/>4<br/>5<br/>6<br/>7<br/>8<br/>9<br/>10<br/>11<br/>12<br/>13<br/>14<br/>15<br/>16<br/>17<br/>18<br/>19<br/>20<br/>21<br/>22<br/>23<br/>24<br/>25<br/>26<br/>27<br/>28<br/>29<br/>30<br/>31<br/>32<br/>33<br/>34<br/>35<br/>36<br/>37<br/>38<br/>39<br/>40<br/>41<br/>42<br/>43<br/>44<br/>45<br/>46</p> <p><i>"It was the prompt support I got from my boss and the company's healthcare team. I would say that it was completely down to the help I got and my own attitude that I could go back to work." - participant number 6</i></p> | <p>Early support at the employers initiative</p> | <p>Superiors</p>       | <p><b>Support from others</b></p> |
| <p><i>"I've got a specialist doctor and feel supported. I feel lucky. Then, I've got a good healthcare centre. I'm insisting on working. My doctor says that it is indeed up to me to decide this." - participant number 2</i></p>                                                                                                                                                                                                                                                                                                                             | <p>Adequate health care contacts</p>             | <p>Healthcare</p>      |                                   |
| <p><i>"One of the best sources of support came from the social insurance fund and my employer, who didn't push too hard." - participant number 10</i></p>                                                                                                                                                                                                                                                                                                                                                                                                      | <p>Cooperation on rehabilitation</p>             | <p>Social security</p> |                                   |

## COREQ (COnsolidated criteria for REporting Qualitative research) Checklist

A checklist of items that should be included in reports of qualitative research. You must report the page number in your manuscript where you consider each of the items listed in this checklist. If you have not included this information, either revise your manuscript accordingly before submitting or note N/A.

| Topic                                          | Item No. | Guide Questions/Description                                                                                                                              | Reported on Page No. |
|------------------------------------------------|----------|----------------------------------------------------------------------------------------------------------------------------------------------------------|----------------------|
| <b>Domain 1: Research team and reflexivity</b> |          |                                                                                                                                                          |                      |
| <i>Personal characteristics</i>                |          |                                                                                                                                                          |                      |
| Interviewer/facilitator                        | 1        | Which author/s conducted the interview or focus group?                                                                                                   |                      |
| Credentials                                    | 2        | What were the researcher's credentials? E.g. PhD, MD                                                                                                     |                      |
| Occupation                                     | 3        | What was their occupation at the time of the study?                                                                                                      |                      |
| Gender                                         | 4        | Was the researcher male or female?                                                                                                                       |                      |
| Experience and training                        | 5        | What experience or training did the researcher have?                                                                                                     |                      |
| <i>Relationship with participants</i>          |          |                                                                                                                                                          |                      |
| Relationship established                       | 6        | Was a relationship established prior to study commencement?                                                                                              |                      |
| Participant knowledge of the interviewer       | 7        | What did the participants know about the researcher? e.g. personal goals, reasons for doing the research                                                 |                      |
| Interviewer characteristics                    | 8        | What characteristics were reported about the interviewer/facilitator? e.g. Bias, assumptions, reasons and interests in the research topic                |                      |
| <b>Domain 2: Study design</b>                  |          |                                                                                                                                                          |                      |
| <i>Theoretical framework</i>                   |          |                                                                                                                                                          |                      |
| Methodological orientation and Theory          | 9        | What methodological orientation was stated to underpin the study? e.g. grounded theory, discourse analysis, ethnography, phenomenology, content analysis |                      |
| <i>Participant selection</i>                   |          |                                                                                                                                                          |                      |
| Sampling                                       | 10       | How were participants selected? e.g. purposive, convenience, consecutive, snowball                                                                       |                      |
| Method of approach                             | 11       | How were participants approached? e.g. face-to-face, telephone, mail, email                                                                              |                      |
| Sample size                                    | 12       | How many participants were in the study?                                                                                                                 |                      |
| Non-participation                              | 13       | How many people refused to participate or dropped out? Reasons?                                                                                          |                      |
| <i>Setting</i>                                 |          |                                                                                                                                                          |                      |
| Setting of data collection                     | 14       | Where was the data collected? e.g. home, clinic, workplace                                                                                               |                      |
| Presence of non-participants                   | 15       | Was anyone else present besides the participants and researchers?                                                                                        |                      |
| Description of sample                          | 16       | What are the important characteristics of the sample? e.g. demographic data, date                                                                        |                      |
| <i>Data collection</i>                         |          |                                                                                                                                                          |                      |
| Interview guide                                | 17       | Were questions, prompts, guides provided by the authors? Was it pilot tested?                                                                            |                      |
| Repeat interviews                              | 18       | Were repeat interviews carried out? If yes, how many?                                                                                                    |                      |
| Audio/visual recording                         | 19       | Did the research use audio or visual recording to collect the data?                                                                                      |                      |
| Field notes                                    | 20       | Were field notes made during and/or after the interview or focus group?                                                                                  |                      |
| Duration                                       | 21       | What was the duration of the interviews or focus group?                                                                                                  |                      |
| Data saturation                                | 22       | Was data saturation discussed?                                                                                                                           |                      |
| Transcripts returned                           | 23       | Were transcripts returned to participants for comment and/or                                                                                             |                      |

| Topic                                  | Item No. | Guide Questions/Description                                                                                                        | Reported on Page No. |
|----------------------------------------|----------|------------------------------------------------------------------------------------------------------------------------------------|----------------------|
|                                        |          | correction?                                                                                                                        |                      |
| <b>Domain 3: analysis and findings</b> |          |                                                                                                                                    |                      |
| <i>Data analysis</i>                   |          |                                                                                                                                    |                      |
| Number of data coders                  | 24       | How many data coders coded the data?                                                                                               |                      |
| Description of the coding tree         | 25       | Did authors provide a description of the coding tree?                                                                              |                      |
| Derivation of themes                   | 26       | Were themes identified in advance or derived from the data?                                                                        |                      |
| Software                               | 27       | What software, if applicable, was used to manage the data?                                                                         |                      |
| Participant checking                   | 28       | Did participants provide feedback on the findings?                                                                                 |                      |
| <i>Reporting</i>                       |          |                                                                                                                                    |                      |
| Quotations presented                   | 29       | Were participant quotations presented to illustrate the themes/findings?<br>Was each quotation identified? e.g. participant number |                      |
| Data and findings consistent           | 30       | Was there consistency between the data presented and the findings?                                                                 |                      |
| Clarity of major themes                | 31       | Were major themes clearly presented in the findings?                                                                               |                      |
| Clarity of minor themes                | 32       | Is there a description of diverse cases or discussion of minor themes?                                                             |                      |

Developed from: Tong A, Sainsbury P, Craig J. Consolidated criteria for reporting qualitative research (COREQ): a 32-item checklist for interviews and focus groups. *International Journal for Quality in Health Care*. 2007. Volume 19, Number 6: pp. 349 – 357

**Once you have completed this checklist, please save a copy and upload it as part of your submission. DO NOT include this checklist as part of the main manuscript document. It must be uploaded as a separate file.**

# BMJ Open

## To work despite chronic health conditions - A qualitative study of workers at the Swedish Employment Service

|                                 |                                                                                                                                                                                                                                                                                                                                                                                                                                                                                                                                                                                                                                                                                                                                                                   |
|---------------------------------|-------------------------------------------------------------------------------------------------------------------------------------------------------------------------------------------------------------------------------------------------------------------------------------------------------------------------------------------------------------------------------------------------------------------------------------------------------------------------------------------------------------------------------------------------------------------------------------------------------------------------------------------------------------------------------------------------------------------------------------------------------------------|
| Journal:                        | <i>BMJ Open</i>                                                                                                                                                                                                                                                                                                                                                                                                                                                                                                                                                                                                                                                                                                                                                   |
| Manuscript ID                   | bmjopen-2017-019747.R2                                                                                                                                                                                                                                                                                                                                                                                                                                                                                                                                                                                                                                                                                                                                            |
| Article Type:                   | Research                                                                                                                                                                                                                                                                                                                                                                                                                                                                                                                                                                                                                                                                                                                                                          |
| Date Submitted by the Author:   | 14-Mar-2018                                                                                                                                                                                                                                                                                                                                                                                                                                                                                                                                                                                                                                                                                                                                                       |
| Complete List of Authors:       | Hjærtström, Carina; Karolinska Institutet, Unit of Occupational Medicine, Institute of Environmental Medicine; Arbetsformedlingen, Department of Rehabilitation to Work<br>Lindahl Norberg, Annika; Karolinska Institutet, Unit of Occupational Medicine, Institute of Environmental Medicine; Stockholms Lans Landsting, Center for Occupational and Environmental Medicine<br>Johansson, Gun; Karolinska Institutet, Unit of Occupational Medicine, Institute of Environmental Medicine; Stockholms Lans Landsting, Center for Occupational and Environmental Medicine<br>Bodin, Theo; Karolinska Institutet, Unit of Occupational Medicine, Institute of Environmental Medicine; Stockholms Lans Landsting, Center for Occupational and Environmental Medicine |
| <b>Primary Subject Heading</b>: | Occupational and environmental medicine                                                                                                                                                                                                                                                                                                                                                                                                                                                                                                                                                                                                                                                                                                                           |
| Secondary Subject Heading:      | Qualitative research, Rehabilitation medicine                                                                                                                                                                                                                                                                                                                                                                                                                                                                                                                                                                                                                                                                                                                     |
| Keywords:                       | OCCUPATIONAL & INDUSTRIAL MEDICINE, REHABILITATION MEDICINE, PUBLIC HEALTH, QUALITATIVE RESEARCH                                                                                                                                                                                                                                                                                                                                                                                                                                                                                                                                                                                                                                                                  |
|                                 |                                                                                                                                                                                                                                                                                                                                                                                                                                                                                                                                                                                                                                                                                                                                                                   |

SCHOLARONE™  
Manuscripts



1  
2  
3  
4  
5 **TO WORK DESPITE CHRONIC HEALTH CONDITIONS- A QUALITATIVE STUDY OF WORKERS**  
6  
7 **AT THE SWEDISH EMPLOYMENT SERVICE**

8 Carina Hjærtström<sup>1,2</sup>, Annika Lindahl Norberg<sup>1,3</sup>, Gun Johansson<sup>1,3</sup>, Theo Bodin<sup>1,3,\*</sup>  
9  
10

11 1 Unit of Occupational Medicine, Institute of Environmental Medicine, Karolinska Institutet,  
12 Stockholm, Sweden

13 2 Arbetsformedlingen, Department of Rehabilitation to Work, Västerås, Sweden

14 3 Center for Occupational and Environmental Medicine, Stockholm County Council, Stockholm,  
15 Sweden  
16

17  
18 Corresponding Author

19 Theo Bodin

20 Centrum för Arbets- och Miljömedicin

21 Solnavägen 4

22 SE-11364 Stockholm

23 SWEDEN

24 [theo.bodin@ki.se](mailto:theo.bodin@ki.se)

25 +46 739 79 25 72  
26

27  
28 Word count excluding abstract: 4835

29  
30 Suggested MeSH terms Workplace, Retirement, Motivation, Leadership, Sweden, Employment,

31  
32 Occupations, Chronic health condition, Work-Life Balance  
33  
34  
35  
36  
37  
38  
39  
40  
41  
42  
43  
44  
45  
46  
47  
48  
49  
50  
51  
52  
53  
54  
55  
56  
57  
58  
59  
60

**ABSTRACT**

**Objectives:** Achieving a sustainable, healthy and long working life is key prerequisite for meeting the demographic challenge posed by an ageing population so that more people can work on into their later years. The objective of this study is to explore the relationship between work and chronic health conditions in a group of employees aged 50-64 with a focus on factors which enable them to continue to work. **Methods:** Ten white-collar workers with one or more chronic health conditions at the Swedish Public Employment Service participated in the study. A qualitative method with semi-structured in-depth interviews was used to collect data. **Results and Conclusions:** This study shows that factors enabling people with chronic health conditions to work include adaptation of the work situation by task-shifting as well as provision of physical aids. Our study suggest that the changes often come at the employee's initiative, hence, there is potential for greater involvement from the employer, healthcare agencies and the social insurance fund in making it easier for employees to adapt their work situation and in providing information regarding available support. It confirms findings in earlier studies that health plays an important part but also that self-confidence and motivation are significant factors contributing to workers being able and wanting to continue working.

### STRENGTHS AND LIMITATIONS OF THIS STUDY

1. All participants in this study has been interviewed by a single person with long work experience in occupational health, especially rehabilitation.
2. It was evident that the study reached an acceptable saturation with regards to factors related to continuation of work and support needs.
3. The description of the study population includes detailed information including self-perceived health and workability index.
4. A limitation is that the invitation was sent by the employer and critical voices might have had second thought on participating.
5. Adherence to the COREQ guidelines has been implemented from the start in order to meet the quality standards for both publishing and inclusion in future reviews.



## BACKGROUND

Achieving a sustainable, healthy and long working life is key prerequisite for meeting the demographic challenge posed by an ageing population. By 2060, there will be only two people of working age (15-64 years) in the EU for every person over 65, compared to a ratio of 4-1 today. This will likely lead to a shortage in the labour force and could result in slower economic growth (1). Sweden has one of the highest rates of employment in the world, including among older workers. In spite of this, 14 % of all employees between the ages of 50 and 64 say that, regardless of the state of their health, they do not think that they will be able to work until the normal retirement age (2). Early retirement from work is a complex process which takes place over time and is dependent on numerous different circumstances at both a personal and society level, where health is one of the most important factors (3).

The number of people with chronic health conditions is rising. In Sweden, more than 650,000 people report that health conditions such as impaired hearing, chronic pain, impaired mobility, mental disabilities, cardiovascular conditions or allergies has a negative effect on their work ability. More than 60 % of those with disabilities without employment think they could perform a job if they were supported with some form of adaptations at work (4). A Dutch study has shown that work adaptations are associated with a decrease in sick leave but are estimated to be underutilized opportunities for people with chronic disease (5). Another study indicates that people with impaired health often end their working life earlier than desired (3,6,7). A systematic review indicates that factors which enable people with chronic musculoskeletal pain to stay at work are different kinds of work adjustment, such as improved ergonomics, and social support , but the evidence is weak (8). People with chronic health conditions have an increased risk of early retirement.(9). There is a great potential to maintain these groups in working life if we have a better understanding of conditions enabling this. However, there are only a few studies that are investigating factors in the work environment which plays a key role in encouraging people with chronic health conditions to participate in the labour market. There is also a lack of research into how workplaces can adapt to and meet the needs and

4

1  
2  
3 requirements of employees with chronic health conditions (3). Employers, also reports lack of  
4  
5 knowledge about disability and possible adaptations at work (10). In light of this, it would seem  
6  
7 important to analyse the experience of people with chronic ill-health conditions in terms of their  
8  
9 working life and work environment, as well as which factors enables them to continue work.  
10

11  
12 The aim of this study is to explore the relationship between work and chronic ill-health in a group of  
13  
14 public sector employees with a focus on factors which enables them to continue to work.  
15

## 16 17 18 **MATERIALS AND METHODS**

### 19 **Preparation of Manuscript**

20  
21  
22 The Consolidated criteria for reporting qualitative research (COREQ) checklist designed for qualitative  
23  
24 studies, in-depth interviews and focus groups has been used to ensure that all the components  
25  
26 which should be included are described in the existing study (11).  
27  
28  
29

### 30 **Patient and Public Involvement**

31  
32 Patients and or public were not involved in development of this study. The results of the study will be  
33  
34 disseminated to study participants through a personal copy of this paper.  
35  
36  
37

### 38 **Study population and recruitment**

39  
40 All the study participants worked for the Swedish Public Employment Service, which is a government  
41  
42 agency whose main task is to help match job-seekers with employers.  
43  
44

45 An email invitation was sent via the employer to all staff in three offices during the period December  
46  
47 2016 – January 2017. An additional email was sent out with a reminder. Some offices mentioned the  
48  
49 study at workplace meetings and put the recruitment letter in the employees' mailboxes.  
50  
51  
52  
53  
54  
55  
56

1  
2  
3 The recruitment letter specified the following inclusion criteria: a) Permanent employee as an  
4 administrator at the Swedish Public Employment Service, b) Aged 50-64 and c) one or more chronic  
5 health conditions since at least one year back.  
6  
7  
8  
9

10 Those interested in participating in the study were requested to contact the studies first author via  
11 email or telephone. An assessment was made at the initial contact as to whether the specified  
12 selection criteria were met before a meeting was arranged for a face-to-face interview. The aim was  
13 to interview between 8 and 12 participants. The interviews took place between January and March  
14  
15  
16  
17  
18  
19  
20  
21  
22 2017.

### 23 **Interviews**

24 A qualitative method with semi-structured in-depth interviews was used to collect data. The  
25 interviews were conducted at the study participants' respective workplaces during working hours.  
26  
27 The study participants chose where and when the meeting would be held. One of the interviews was  
28 conducted via Skype. All interviews were conducted individually, with one interview per study  
29 participant. The interviews were conducted by the lead author, who is a woman, master's student  
30 and physiotherapist, with more than seven years' of work experience in vocational rehabilitation.  
31  
32  
33  
34  
35  
36

37 The interviews lasted between 45 and 75 minutes. There were also a few minutes where the  
38 interviewer introduced herself, the study and its purpose, and also asked the participant to sign the  
39 consent form. The interviews ended with a summary by the interviewer. Field notes were not made  
40 during the interview.  
41  
42  
43  
44  
45

46 An interview guide approach was used for the interviews, appendix 1. The interview guide was  
47 designed by the study authors and was used in a pilot interview before data was collected.  
48  
49  
50

51 Furthermore, the interviews ended with four ratings scales relating to work ability, general state of  
52 health and motivation to work. The purpose of the rating scales was to give a fuller description of the  
53 study participants. The ratings were done at the end of the interviews to avoid interference with the  
54  
55  
56  
57  
58  
59  
60

1  
2  
3 interview. The following four questions were used to survey self-perceived work ability, motivation  
4 and health:

5  
6  
7 1) How would you assess your current work ability compared to when it was at its peak on a scale  
8 from 0 to 10? (0 = cannot work at all, 10 = work ability when it is/was at its peak) 2) Thinking about  
9 your health – do you think that you can still be doing your current job in two years? (No, I don't, I  
10 don't really know, Yes, I definitely will be). 3) How important is work to you on a scale from 1 to 10?  
11 (0 = not at all important, 10 = extremely important. 4) How would you assess your general state of  
12 health? (very good, good, reasonable, poor and very poor).  
13  
14  
15  
16  
17  
18  
19  
20

## 21 **Analysis**

22 The interviews were recorded, transcribed verbatim and coded by the lead author. Inductive  
23 thematic analysis was used for analysis (12). The entire analysis covered six phases: reading and re-  
24 reading the transcripts, initial coding, identifying subthemes and themes, reviewing the themes in  
25 relation to the coded data, defining and describing the themes, and finally producing a synthesis of  
26 the results in this paper. The analysis was inductive and the structure of the initial coding was guided  
27 by the study aim. Data extracts related to the subject matter were identified, condensed, and coded.  
28 Subsequently, codes were organised in preliminary themes. These were reviewed and revised in  
29 dialogue with the uncondensed interview data, emerging into a final theme structure. Due to the  
30 manageable amount of data, specific analysis software was not used, and instead MS Word table  
31 could be used to keep the structure of the analysis. The analysis was based on the study participants'  
32 manifest statements. The analysis was performed by the lead author, who throughout the analysis  
33 process discussed the coding and the themes with the co-authors. The rest of the research team  
34 comprises a doctor, sociologist and psychologist, who all hold PhDs. Transcriptions were not sent to  
35 the informants.  
36  
37  
38  
39  
40  
41  
42  
43  
44  
45  
46  
47  
48  
49  
50  
51  
52  
53  
54  
55  
56  
57  
58  
59  
60

1  
2  
3 Quotes from the study participants, which are presented in the results section, appear in italics. The  
4  
5 word order has sometimes been changed and they have been shortened to make them easier to  
6  
7 read. Some words have been removed to avoid identification.  
8  
9

### 10 **Ethical considerations**

11  
12 The study has been approved by the Regional Ethical Review Board in Stockholm, reference number  
13  
14 2016/2105-31/5.  
15  
16

## 17 **RESULTS**

### 18 **Description of the study population**

19  
20  
21 Ten employees from three different offices expressed an interest in the study. They all met specified  
22  
23 criteria and participated in the study. Informants' characteristics are summarized in table 1. The most  
24  
25 frequently occurring chronic health conditions were long-term pain conditions, hearing loss, state of  
26  
27 fatigue, as well as cardiovascular diseases. Four study participants reported one condition, two  
28  
29 persons two conditions and the remaining four reported three or more. One person was on sick  
30  
31 leave 25% of the time. Current work ability, compared to when it was at its best was high (median =  
32  
33 8) for all participants except one individual who indicated 2 on the scale from 0-10. In terms of  
34  
35 forecasting their work ability in two years from now, in light of their current state of health, seven  
36  
37 out of ten study participants reckoned they were sure that they could do their current job in two  
38  
39 years if the same circumstances applied. Most of them considered their general state of health to be  
40  
41 fairly good or acceptable, in spite of enduring restrictions for many years due to chronic health  
42  
43 conditions. Work was considered to be important in many respects by all the study participants.  
44  
45  
46  
47  
48

49  
50 Insert table 1 here  
51  
52

### 53 **General observations of factors related to continuation of work despite having a chronic** 54 **health condition**

55  
56  
57 8  
58  
59

1  
2  
3 The condensation of the interviewees produced 13 sub-themes which could further be grouped into 5  
4 main themes. The sub-themes and main themes are presented in table 2 and a detailed presentation  
5 of example quotes and condensations are found in table 1 in the Appendix. Almost all of the study  
6 participants reported different types of adaptations as important factors to enable continuation of  
7 work. In the cases when adaptations of work hadn't taken place for one reason or the other, this was  
8 perceived as a problem. Further, it was also evident that the adaptations that had taken place in  
9 most cases came at the informants' own initiative. Although the study participants who had  
10 informed their employer about their health condition experienced support, most participants had  
11 chosen not to tell the employer. Work was perceived to promote health and as a way to reduce the  
12 impact of the chronic condition on quality of life, contributing to social cohesion and sense of  
13 purpose.  
14  
15  
16  
17  
18  
19  
20  
21  
22  
23  
24  
25

26  
27 Insert table 2 here  
28  
29

### 30 **Adaptation of work**

31 Physical adaptation/aid, such as an adapted chair, an adjustment made to a computer workstation or  
32 getting their own separate office were mentioned as significant and important requirements for  
33 coping with work by the participants who had received this type of support. Several study  
34 participants had the perception that their employer was generous with providing physical aids if they  
35 were asked to do so. *"There are no problems getting help. I've always had good gadgets, a suitable  
36 chair, a Mousetrapper mouse and other devices to help me at my workstation. I'm eternally grateful  
37 for this."* - participant number 6  
38  
39  
40  
41  
42  
43  
44  
45  
46

47 On the other hand, requests for aids were seldom made as they did not know what they should ask  
48 for, or they did not take the time to ask for it. As one of the respondents witnessed, the difficulty in  
49 getting an own office appeared to be a major obstacle to cope with work; *"I find it extremely hard to  
50 concentrate and take in what I'm doing when there are several of us in an office"* - participant number  
51  
52  
53  
54  
55

56 7

57 9  
58  
59  
60

1  
2  
3 Modifications to work tasks resulted in fewer physical and mental demands. Examples of these  
4  
5 modifications included fewer, but more specialised tasks, less customer contact, greater opportunity  
6  
7 for own planning and, in some cases, less administration. Study participants who had adapted their  
8  
9 work tasks also found it contributing to a better work–life balance. A change in the approach to  
10  
11 work, based on work arrangements and suitable strategies, played a significant role in making work  
12  
13 easier. Strategies which emerged included reorganizing work through introduction of flexitime and  
14  
15 remote working as well as changing details such as varying posture while working and taking more  
16  
17 frequent breaks. Two of the participants summarize both changes in work content and organization:  
18  
19 *“I used to have greater responsibility in my job, but I felt that it got too much for me. I needed to*  
20  
21 *change the tasks I did for the good of my health. This means that what works for me now is less*  
22  
23 *responsibility, flexitime and I can manage my time better. I now enjoy my job too!”* - participant  
24  
25 number 3 *“I don’t need to go off sick. If my work allows it, I can work flexitime and go home earlier*  
26  
27 *that day to rest. And I can now also plan my new work tasks better.”* participant number 10  
28  
29

30  
31 Although the participants found their employers to be supportive in general, they sometimes  
32  
33 perceived no sense of urgency or well-established routines to go about adjusting work. One  
34  
35 participant said that the process of getting adaptations made to both equipment and tasks was both  
36  
37 complicated, time-consuming and aggravating the health condition: *“I would have avoided a great*  
38  
39 *deal of stomach-ache if it hadn’t been so complicated. Because there is actually mental stress*  
40  
41 *involved as well. The whole thing took a good year. If it had gone a bit more quickly, I might have*  
42  
43 *perhaps been in a better state than I am now.”*- participant number 4  
44  
45

#### 46 47 **Life style**

48  
49 Physical activity and achieving work-life balance seemed to be important elements in terms of coping  
50  
51 better with work increased well-being and maintained work ability. Work-life imbalance had  
52  
53 prompted participants to make changes both at work and at home. Reducing working time, changing  
54  
55 work content to both less demanding tasks and a decrease in amount of work were all ways of  
56

57  
58  
59  
60  
10

1  
2  
3 attaining a better work-life balance. At home, some of the participants contemplated to hire a maid  
4  
5 in order to be able to keep working. However, in one case, combining continued work at the agency  
6  
7 and having a personal life seemed to be utopian: *"If I could modify my current work more, I think I*  
8  
9 *can work at 67, because I think the job is fun. Now I just feel I'm working, going home, sitting and*  
10  
11 *doing nothing and then I'm going to bed. I have no energy to exercise or invite friends, I can't even*  
12  
13 *think of it. But I've actually searched for another job, [laughing], I'm 63 years old and have searched*  
14  
15 *for another job!"* - participant number 9  
16

17  
18 The end of the quote above illustrates how the notion of being older with a chronic health condition  
19  
20 limits one's options in attaining work-life balance. The only resolve for some seemed to reach  
21  
22 retirement age through part-time work. *"I'll be 63 soon. I have just started thinking about changing*  
23  
24 *my work situation, maybe decrease working hours. I have not thought so before, but now the work*  
25  
26 *takes so much energy and removes so much from my private life. I have no energy for my*  
27  
28 *grandchildren nor my home, that's how it is."* – participant number 2  
29  
30

31  
32 Physical activity and leisure activities were seen by many as ways to improve their health, both  
33  
34 physical and mental, thereby enabling them to cope with work better. Leisure activity was a way of  
35  
36 recharging the batteries and relaxing mentally, which seemed to be especially important for jobs  
37  
38 involving a high level of mental stress. Conversely, in those cases where participants could not do any  
39  
40 physical activity, they felt it contributed to a deterioration in their condition: *"One thing that's*  
41  
42 *extremely important is that if I don't move about, I feel worse. A gym class and yoga are very*  
43  
44 *important, just as important as the medication I take."* - participant number 10  
45  
46

### 47 **Confidence in one's own abilities**

48  
49  
50 Confidence was reflected in the study participants' own view of their condition, their acceptance of it  
51  
52 and of a notion that they could influence their situation.  
53  
54



1  
2  
3 Acceptance of the state of their health was prominent among the interviewees. In spite of the  
4  
5 restrictions which the disease entailed, most of them voiced the attitude "when life gives you lemons  
6  
7 you make lemonade" and that their situation could have been worse. As one participant said: *"I'm*  
8  
9 *almost constantly in pain, but you still learn to live with it somehow."* - participant number 9

10  
11  
12 Confidence in their own ability was perceived to be high, in spite of the tough conditions they  
13  
14 endured, as one study participant put it: *"I couldn't keep doing the job I was doing then, when I was*  
15  
16 *very ill, but when I got better, I wanted this job 100% and everyone said that I was mad... But I said*  
17  
18 *that it was maybe something that I could definitely do. Otherwise, I might as well stop."* - participant  
19  
20 number 7

21  
22  
23 Perceived adjustment latitude, in terms of the ability to change their work environment and work  
24  
25 situation was a common feature. Overall, everyone felt that they could influence their situation in  
26  
27 some way, if they wanted: *"If there's something wrong, I fix it. I don't just sit there and wait for*  
28  
29 *someone else to do something."* - participant number 1

### 30 31 32 33 **Motivation**

34  
35 Even though some participants encountered major difficulties due to their condition, they expressed  
36  
37 a strong motivation to work and find solutions enabling them to continue their working life.

38  
39 Intellectual stimulus, meaning interesting, varied and challenging work tasks was regarded as  
40  
41 important motivational factors. *"I'm lucky that I think I've got a job that I enjoy and find interesting.*  
42  
43 *Otherwise, I would have gone home a long time ago and gone on sick leave."* - participant number 4

44  
45 Just as important motivational factor was the social dimension of work: *"The job is extremely*  
46  
47 *important. That's all there is to it. It's particularly important since I can enjoy the social aspect and be*  
48  
49 *stimulated. It definitely means that I enjoy it a great deal."* - participant number 7 Thirdly, a sense of  
50  
51 purpose and perceptions that the work they did benefited other people in difficult situations added  
52  
53 to motivation and work satisfaction: *"... apart from working to pay for food and rent, work is*  
54  
55

1  
2  
3 *definitely a major driving force for the social side of things, allowing you to feel that you can make a*  
4  
5 *difference.” - participant number 8*  
6  
7

### 8 **Supporting structures**

9

10 Three supporting structures were identified as especially important to enable work despite a chronic  
11 health condition. These were support from superior, support from healthcare agencies and support  
12 from the social insurance fund.  
13  
14

15  
16  
17 Support from superiors was in most cases initiated only after the participant had made such a  
18 demand. The support consisted of organizing work and help with task shifting. Support from the  
19 company’s occupational health care provider was usually initiated by the employer and could include  
20 workplace interventions and a long-term rehabilitation plan. Study participants said that this support  
21 contributed to peace of mind, reduced anxiety and meant less time off sick. *“It was the prompt*  
22 *support I got from my boss and the company’s healthcare team. I would say that it was completely*  
23 *down to the help I got and my own attitude that I could go back to work.” - participant number 6*  
24  
25  
26  
27  
28  
29  
30  
31

32  
33 Support from healthcare, which included different healthcare agencies, such as primary care,  
34 specialists and the occupational health care providers. Suitable medical and behavioural treatment,  
35 guided physical activity, physical treatment, knowledge of self-care and individual training, assistance  
36 with getting their own office and, to a certain degree, advice about job scope were some of the  
37 forms of support provided. Support from the healthcare agencies was considered to be just as vital  
38 for those who had received it as it was perceived as a major loss for those did had not. Some said  
39 that the company’s occupational health care provider was hard to access and there was uncertainty  
40 regarding which type of support they could give. Others mentioned the contribution made by the  
41 company’s healthcare team, with support for a change in behaviour in relation to achieving an  
42 activity balance. The participants said that contact with the regular health-care system was a private  
43 thing and cooperation with other supporting structures did not occur.  
44  
45  
46  
47  
48  
49  
50  
51  
52  
53  
54  
55  
56

1  
2  
3  
4  
5  
6 Support from the social insurance fund, in cooperation with the employer, seemed to some study  
7  
8 participants to be a success factor in terms of finding a sustainable work situation. The cooperation  
9  
10 was usually initiated by the insurance fund, but also by the employee. The support measures  
11  
12 implemented were a long-term rehabilitation plan, work training, an opportunity to try out new work  
13  
14 tasks and a gradual increase in working hours as the study participants' well-being improved. This  
15  
16 helped these study participants to find a sustainable solution and achieve a balance in their working  
17  
18 hours and tasks. One interviewee with recurring depression, for whom gradual return-to-work was  
19  
20 incremental for success said that *"One of the best sources of support came from the social insurance*  
21  
22 *fund and my employer, who didn't push too hard."* - participant number 10  
23  
24  
25  
26

## 27 **DISCUSSION**

28  
29 The analysis process highlighted five main themes which influencing the continuation of the study  
30  
31 participant's work-life, even when suffering from chronic health conditions. Major emphasis has  
32  
33 been placed on describing factors which enable rather than hindering work. The study's results show  
34  
35 with good consensus that factors enabling people to continue work while suffering a chronic health  
36  
37 condition include adapting the work situation by complete or partial task-shifting, and provision of  
38  
39 physical aids. Other themes found are adaptation of individual behaviour related to work and  
40  
41 personal life. We also found that the study participants' view of their condition, their confidence in  
42  
43 their own ability and motivation to work also were significant factors contributing to both wanting  
44  
45 and being able to work. In this study, all participants felt that they could ( if they wanted to) influence  
46  
47 both their work situation and work environment to a certain degree, a finding that highlights the  
48  
49 importance of agency and adjustment latitude.  
50  
51

52  
53 Young et al (2005) criticized existing disability research for a tendency to only distinguish between  
54  
55 those working and those out of work. Instead they propose that focus should be on differentiating  
56

1  
2  
3 between those who are still transitioning to stable employment and those who have achieved  
4 vocational stability (13). The group studied here can all be said to have achieved vocational stability  
5 although some are still in a transitional stage. Most research on chronic health condition and work  
6 has a focus on the return to work process which happens early in a transitional stage.  
7  
8  
9

10  
11  
12 Loisel et al. (2001) proposed a new paradigm for what they called disability prevention which in turn  
13 was defined as prolonged absence from work (14). Within this paradigm, causes to disability were  
14 found within four systems: the worker with the symptoms, the workplace, the healthcare system,  
15 and the compensation system. Our results show that these causes also seem to be evident when it  
16 comes to understanding reasons for vocational stability among those with chronic health condition.  
17  
18 There are few studies on retention of workers with chronic disease at work (15) and the the main  
19 contribution of our study is that it, reassuringly enough, indicates that the same factors are in play  
20 for “return-to-work” as “stay-at-work” for employees with chronic disease.  
21  
22  
23  
24  
25  
26  
27  
28  
29

30  
31  
32 Adaptation measures in the workplace offer relevant support with a positive impact on work ability  
33 (16,17). Employers are required by law to adapt working conditions to individuals’ different physical  
34 and mental requirements (18). Possible reasons for failing to or delaying adaptations are frequent  
35 changes in management, ignorance of the issue among employers or study participants deciding not  
36 to mention any support requirements. Norstedt (2016) highlights difficulties which people who have  
37 hidden functional impairments have about mentioning this in their workplaces as their perceptions  
38 are that it can result in adverse consequences (19). Other studies have suggested that dialogue  
39 between the employer and employee and tailored work-related interventions may be helpful (7).  
40  
41 This is confirmed in this study where the study participants who decided to talk to their employer  
42 about this matter have perceived that they have received good adaptations and support.  
43  
44  
45  
46  
47  
48  
49  
50

51  
52 Lifestyle factors, such as physical activity, other leisure activities and behavioural changes in order to  
53 attain a good work-life balance seemed to play a significant role to stay at work despite health issues.  
54  
55  
56

1  
2  
3 Physical activity in particular seemed to be a strong contributory factor in preventing further  
4  
5 deteriorating of the participants' health, thereby improving their work ability, which tallies with the  
6  
7 findings from other research studies (20).  
8  
9

10 Confidence in one's own ability, often labelled "self-efficacy" or "coping", plays an important role in  
11  
12 how individuals handle specific situations and is a determinant of their ability to influence their  
13  
14 situation (21). The group of informants in the present study held a pragmatic view of their options in  
15  
16 life and generally showed broad acceptance of their situation and a high level of confidence in their  
17  
18 own ability. From an outsider's perspective, their health status did not seem to correlate with their  
19  
20 perceived health or their self-reported work ability, highlighting the importance of a holistic  
21  
22 approach tailored for the individual in order to retain workers with chronic disease while also  
23  
24 maintaining productivity as proposed in previous research by others (15). Confidence in their own  
25  
26 ability could also have been reinforced by the generally high level of adjustment latitude, which is  
27  
28 well known to be associated to a lower risk of sick leave (22,23). It also aligns well with findings that  
29  
30 expanded job control could be an important way to counteract the effect of decreased work ability  
31  
32 on productivity (24).  
33  
34  
35

36 Work motivation was high for all respondents, irrespective of health status. Although factors outside  
37  
38 the workplace are important, our results suggest that it should be possible to develop and evaluate  
39  
40 interventions aimed at maintaining work motivation, especially intellectual stimulation, social  
41  
42 cohesion and sense of purpose. It seems important to help workers to maintain and cultivate a sense  
43  
44 of coherence (25) at the workplace- where comprehensibility, manageability, and meaningfulness  
45  
46 can contribute to the individual's health. In order to adapt work and maintain good social work  
47  
48 environment, support, especially from superiors who contribute to creating opportunities for a  
49  
50 longer working life and have a positive impact on workers' health (26,27). Some participant had  
51  
52 received support from their superior in different ways, including finding suitable work tasks and  
53  
54 adapting the way of working. Study participants who additionally received support from the  
55  
56

1  
2  
3 healthcare team and social insurance fund acknowledged that this was a further boosting factor.  
4  
5 These results are in line with findings by others, that employers who adopt a structured approach to  
6  
7 rehabilitation, cooperate with other agencies and have strong leadership functions have healthier  
8  
9 employees (28). The study participants felt a general lack of support from the healthcare agencies,  
10  
11 which is common among people with a chronic health condition (29). National guidelines indicate the  
12  
13 importance of the support provided by healthcare agencies in terms of rehabilitation by offering  
14  
15 continuous, coordinated care to people with a chronic health condition of working age, enabling  
16  
17 them to cope with working life (30). Varekamp et al. (2006) also highlight the importance of the  
18  
19 overlap between the provision of healthcare and rehabilitation geared towards working life (31).  
20  
21  
22

### 23 **Strengths and limitations**

24  
25  
26 The trustworthiness of our study is primarily established through the credibility of the research  
27  
28 methods we applied (32). The choice of semi-structured, in-depth interviews was to give greater  
29  
30 scope for individuals to talk about their experiences and thoughts. It is regarded as a flexible and  
31  
32 tried-and-trusted method for gathering data in the field of healthcare research (33). Interviews was  
33  
34 held by the same author to ensure the same procedure. No field notes were taking during the  
35  
36 interviews, to enable an active and attentively listening. Those were important steps to avoid self-  
37  
38 understanding and interpretation and to achieve credibility in the findings. The study author's  
39  
40 experience of working in the field of work-related rehabilitation and of working for the same  
41  
42 employer as the study participants is mainly considered to be a strength as it made iterative  
43  
44 questioning possible, i.e. ask follow-up questions and go into greater depth on various questions.  
45  
46  
47

48 A limitation, both with regards to establishing credibility and transferability is that this study is  
49  
50 limited to a small number of participants and a single employer. Aspects of work and chronic disease  
51  
52 that could be present among employees in e.g. private sector or manual work have not been  
53  
54 investigated in this study. In spite of the small numbers, the data material gathered is considered to  
55  
56

1  
2  
3 have achieved saturation, based on the study's questions. This was indicated by a large level of  
4  
5 consensus and recurrently similar answers within the question areas. This was true in spite of  
6  
7 different genders, professional categories and workplaces featuring in the study. Although the results  
8  
9 should be interpreted with caution, they are consistent with previous research (3,5,7,8,31,34). The  
10  
11 dependability and confirmability of this study was assured through close adherence to COREQ  
12  
13 guidelines (11) and detailed reporting of methodology in order to enable the reader to make a critical  
14  
15 appraisal of our study.  
16  
17  
18  
19

## 20 **CONCLUSIONS**

21 This study found that factors enabling workers with chronic health conditions to work include early  
22  
23 adaptation of the work situation ,life-style conditions, confidence, motivation and support. Similar to  
24  
25 what has been shown in disability research , our results indicate that stakeholders such as the  
26  
27 individual, the work place , the compensation system and the health care system, can support ability  
28  
29 and motivation to work among those with a chronic health condition. There is a need for more  
30  
31 studies of conditions enabling people with health conditions to remain in work. As this study only  
32  
33 included civil servants, future studies should also focus on what enables work among manual  
34  
35 workers with a chronic health condition.  
36  
37  
38  
39  
40

## 41 **ACKNOWLEDGEMENTS**

42 I would like to sincerely thank all the study participants who took the time to take part and talk about  
43  
44 their experiences. I hope that I have done justice to the information you provided. I would also like to  
45  
46 thank the employers for agreeing to participate and to those who helped with sending out the study  
47  
48 invitations.  
49  
50  
51  
52

## 53 **CONTRIBUTORSHIP STATEMENT**

1  
2  
3 The study was conceived by Carina Hjärtström and Theo Bodin. The study protocol was developed by  
4  
5 Carina Hjärtström, Annika Lindahl Norberg and Theo Bodin. The interviews were recorded,  
6  
7 transcribed verbatim by Carina Hjärtström, and analysed by Carina Hjärtström under supervision  
8  
9 from Annika Lindahl Norberg. The interpretation of the findings was done by Carina Hjärtström,  
10  
11 Annika Lindahl Norberg, Gun Johansson and Theo Bodin. The first draft of the manuscript was done  
12  
13 by Carina Hjärtström. All subsequent drafts were commented upon and revised by all authors. The  
14  
15 submitted version of the manuscript was approved by all authors.  
16  
17  
18  
19

### 20 **COMPETING INTERESTS**

21 Carina Hjärtström works at the Swedish Public Employment Service. The employer was not involved  
22  
23 in designing and analysing the study and had no influence over the study's conclusions. The other  
24  
25 authors state that they have no conflicts of interest or objections.  
26  
27  
28  
29

### 30 **FUNDING**

31 This Study was supported by the Swedish Research Council for Health, Working Life and Welfare,  
32  
33 FORTE  
34  
35  
36  
37  
38

### 39 **DATA SHARING STATEMENT**

40 This study does not include any data that could be shared  
41  
42  
43  
44  
45  
46  
47  
48  
49  
50  
51  
52  
53  
54  
55  
56  
57



**References:**

1. de Jong PR. Sickness, disability and work: breaking the barriers—a synthesis of findings across OECD countries—by OECD. *Int Soc Secur Rev.* 2011;64(3):103–4.
2. Arbetsmiljöverket. *The work environment 2013.* 2014;(2014:3).
3. Hasselhorn HM, Apt W. *Understanding employment participation of older workers: Creating a knowledge base for future labour market challenges.* Berlin; 2015.
4. Sverige, Statistiska centralbyrån. *Situationen på arbetsmarknaden för personer med funktionsnedsättning 2015 / The labour market situation for people with disabilities 2015 / Statistics Sweden.* Stockholm: Statistiska centralbyrån (SCB); 2016.
5. Boot CR, van den Heuvel SG, Bültmann U, de Boer AG, Koppes LL, van der Beek AJ. *Work adjustments in a representative sample of employees with a chronic disease in the Netherlands.* *J Occup Rehabil.* 2013;23(2):200–8.
6. Solem PE, Syse A, Furunes T, Mykletun RJ, De Lange A, Schaufeli W, et al. *To leave or not to leave: retirement intentions and retirement behaviour.* *Ageing Soc.* 2016;36(2):259–81.
7. De Wind A, Geuskens GA, Reeuwijk KG, Westerman MJ, Ybema JF, Burdorf A, et al. *Pathways through which health influences early retirement: a qualitative study.* *BMC Public Health.* 2013;13(1):292.
8. de Vries HJ, Reneman MF, Groothoff JW, Geertzen JH, Brouwer S. *Factors promoting staying at work in people with chronic nonspecific musculoskeletal pain: a systematic review.* *Disabil Rehabil.* 2012;34(6):443–58.
9. de Jong M, de Boer AG, Tamminga SJ, Frings-Dresen MH. *Quality of working life issues of employees with a chronic physical disease: a systematic review.* *J Occup Rehabil.* 2015

1  
2  
3 Mar;25(1):182–96.  
4

5  
6 10. Kaye H, Jans L, Jones E. Why Don't Employers Hire and Retain Workers with  
7 Disabilities? *J Occup Rehabil.* 2011;21(4):526–36.  
8

9  
10 11. Tong A, Sainsbury P, Craig J. Consolidated criteria for reporting qualitative research  
12 (COREQ): a 32- item checklist for interviews and focus groups. *Int J Qual Health Care.*  
13 2007;19(6):349–57.  
14

15  
16 12. Braun V, Clarke V. Using thematic analysis in psychology. *Qual Res Psychol.*  
17 2006;3(2):77–101.  
18

19  
20 13. Young AE, Roessler RT, Wasiak R, McPherson KM, Van Poppel MN, Anema JR. A  
21 developmental conceptualization of return to work. *J Occup Rehabil.* 2005;15(4):557–68.  
22

23  
24 14. Loisel P, Durand M-J, Berthelette D, Vézina N, Baril R, Gagnon D, et al. Disability  
25 prevention. *Dis Manag Health Outcomes.* 2001;9(7):351–60.  
26

27  
28 15. Leijten F, van den Heuvel S, Geuskens G, Ybema JF, de Wind A, Burdorf A, et al.  
29 How do older employees with health problems remain productive at work?: a qualitative study. *J*  
30 *Occup Rehabil.* 2013;23(1):115–24.  
31

32  
33 16. Franche R-L, Cullen K, Clarke J, Irvin E, Sinclair S, Frank J. Workplace- Based  
34 Return-to- Work Interventions: A Systematic Review of the Quantitative Literature. *J Occup Rehabil.*  
35 2005;15(4):607–31.  
36

37  
38 17. Vooijs M, Leensen MC, Hoving JL, Wind H, Frings-Dresen MH. Interventions to  
39 enhance work participation of workers with a chronic disease: a systematic review of reviews. *Occup*  
40 *Env Med.* 2015 Nov;72(11):820–6.  
41

42  
43 18. Arbetsmiljöverket. Arbetsanpassning och rehabilitering AFS 1994:1. Stockholm:  
44 Arbetsmiljöverket; 1994.  
45

46  
47  
48  
49  
50  
51  
52  
53  
54  
55  
56  
57 21  
58  
59  
60

- 1  
2  
3 19. Norstedt M. Att avslöja sina dolda funktionsnedsättningar i arbetslivet. *Arbetsmarknad*  
4 *Arbetsliv*. 2016;22(2):36–48.  
5  
6  
7  
8 20. Arvidson E, Börjesson M, Ahlberg G, Lindegård A, Jonsdottir IH. The level of leisure  
9 time physical activity is associated with work ability—a cross sectional and prospective study of health  
10 care workers. *BMC Public Health*. 2013;13(1):855.  
11  
12  
13  
14 21. Dehlin O, Hagberg B. Inte hur man har det utan hur man tar det. *Läkartidningen*.  
15 2000;97(5):430–3.  
16  
17  
18  
19 22. Johansson G, Lundberg I. Adjustment latitude and attendance requirements as  
20 determinants of sickness absence or attendance. Empirical tests of the illness flexibility model. *Soc Sci*  
21 *Med*. 2004;58(10):1857–68.  
22  
23  
24  
25 23. Leijten FRM, de Wind A, van den Heuvel SG, Ybema JF, van der Beek AJ, Robroek  
26 SJW, et al. The influence of chronic health problems and work-related factors on loss of paid  
27 employment among older workers. *J Epidemiol Community Health*. 2015;69(11):1058–65.  
28  
29  
30  
31  
32 24. van den Berg TI, Robroek SJ, Plat JF, Koopmanschap MA, Burdorf A. The importance  
33 of job control for workers with decreased work ability to remain productive at work. *Int Arch Occup*  
34 *Environ Health*. 2011 Aug 1;84(6):705–12.  
35  
36  
37  
38 25. Antonovsky A. *Unraveling the mystery of health: How people manage stress and stay*  
39 *well*. Jossey-Bass; 1987.  
40  
41  
42  
43  
44 26. Krause N, Lynch J, Kaplan GA, Cohen RD, Goldberg DE, Salonen JT. Predictors of  
45 disability retirement. *Scand J Work Env Health*. 1997;23(6):403–13.  
46  
47  
48  
49 27. Searle B, Bright JEH, Bochner S. Helping people to sort it out: The role of social  
50 support in the Job Strain Model. *Work Stress*. 2001;15(4):328–46.  
51  
52  
53  
54 28. Svartengren M, Stoetzer U, Parmasund M, Eriksson T, Stöllman Å, Vingård E. *Hälsa*  
55  
56  
57 22

1  
2  
3 och framtid i kommuner och landsting. Stockholm; 2013.  
4

5  
6 29. Socialstyrelsen. Hälsa- och sjukvård vid kroniska sjukdomar. Socialstyrelsen; 2015.  
7

8  
9 30. Government of Sweden. Nationell strategi för att förebygga och behandla kroniska  
10 sjukdomar : 2014-2017. Stockholm: Socialdepartementet, Regeringskansliet; 2014.  
11

12  
13 31. Varekamp I, Verbeek JH, van Dijk FJ. How can we help employees with chronic  
14 diseases to stay at work? A review of interventions aimed at job retention and based on an  
15 empowerment perspective. *Int Arch Occup Env Health*. 2006 Nov;80(2):87–97.  
16  
17  
18

19  
20 32. Shenton AK. Strategies for ensuring trustworthiness in qualitative research projects.  
21 *Educ Inf*. 2004;22(2):63–75.  
22  
23

24  
25 33. Diccico-Bloom B, Crabtree BF. The qualitative research interview. *Med Educ*.  
26 2006;40(4):314–21.  
27  
28

29  
30 34. Loisel P, Buchbinder R, Hazard R, Keller R, Scheel I, Van Tulder M, et al. Prevention  
31 of work disability due to musculoskeletal disorders: the challenge of implementing evidence. *J Occup*  
32 *Rehabil*. 2005;15(4):507–24.  
33  
34  
35  
36  
37  
38  
39  
40  
41  
42  
43  
44  
45  
46  
47  
48  
49  
50  
51  
52  
53  
54  
55  
56

**Table 1.** Background information and characteristics of informants (n=10).

|                                                            |                         |              |
|------------------------------------------------------------|-------------------------|--------------|
| <b>Sex</b>                                                 | Men                     | 2            |
|                                                            | Women                   | 8            |
| <b>Age</b>                                                 | Median (range)          | 59,5 (51-63) |
| <b>Educational level</b>                                   | High-school or lower    | 4            |
|                                                            | University              | 6            |
| <b>Health status</b>                                       | Very poor               | 0            |
|                                                            | Poor                    | 0            |
|                                                            | Reasonable              | 5            |
|                                                            | Good                    | 5            |
|                                                            | Very good               | 0            |
| <b>Years with chronic health condition</b>                 | > 5 years               | 2            |
|                                                            | > 10 years              | 8            |
| <b>Most common chronic health conditions</b>               | Chronic pain condition  |              |
|                                                            | Hearing loss            |              |
|                                                            | Burnout/chronic fatigue |              |
|                                                            | Cardiovascular disease  |              |
| <b>Employment activity</b>                                 | Part-time               | 3            |
|                                                            | Fulltime                | 7            |
| <b>Years at current employer</b>                           | 8 – 30 years            |              |
| <b>Importance of work (1-10)</b>                           | Median (range)          | 8(5-9)       |
| <b>Work ability (0-10)</b>                                 | Median (range)          | 8 (2-9)      |
| <b>Will be working at the same job in 2 years from now</b> | No                      | 0            |
|                                                            | Don't know              | 3            |
|                                                            | Yes, definitely         | 7            |

**Table 2.** Thematic analysis of factors enabling work despite chronic health conditions

| Sub-theme                                                                             | Main theme                        |
|---------------------------------------------------------------------------------------|-----------------------------------|
| Physical adaptation/aid<br>Modifications to work tasks<br>Changes in approach to work | Adaptation                        |
| Work-life balance<br>Physical activity                                                | Life-style                        |
| Acceptance<br>Decision latitude                                                       | Confidence in one's own abilities |
| Intellectual stimulus<br>Social cohesion<br>Sense of purpose                          | Motivation                        |
| Superiors<br>Healthcare<br>Social security                                            | Support from others               |

## Appendix

### Interview guide

#### Background questions before interview

- Age
- Sex
- Professional title
- Length of education
- Duration of working hours
- Employed since year
- Diagnosis
- Debut year of disease

#### Semi-structured interview

1. Describe how a typical day at work looks like for you?
2. How does your health affect your work today?
3. What is it that makes it possible to work today?
4. Does your employer and colleagues know about your health situation?
5. Do you have or have you had any adjustment or support at work and in such cases what?
6. Do you miss any support today?
7. Do you see any need for support later on and in such cases what?
8. Do you feel that you can influence your work environment vs work situation?
9. How do you look at the opportunities for a long professional life?

#### Background questions after the interview

- Individual conditions/family situation
- Financial/economic incentives
- Healthcare contacts
- Sickness benefit

- 1  
2  
3  
4  
5  
6  
7  
8  
9  
10  
11  
12  
13  
14  
15  
16  
17  
18  
19  
20  
21  
22  
23  
24  
25  
26  
27  
28  
29  
30  
31  
32  
33  
34  
35  
36  
37  
38  
39  
40  
41  
42  
43  
44  
45  
46  
47  
48  
49  
50  
51  
52  
53  
54  
55  
56  
57  
58  
59  
60
- How would you assess your general state of health?
    - Very good
    - Good
    - Reasonable
    - Poor
    - Very poor
  - How important is work to you on a scale from 1-10?
    - 10 point VAS scale
      - 0 = not at all important
      - 10 = extremely important)
  - Thinking about your health - do you think that you can still be doing your current job in two years?
    - No, I don't
    - I don't really know
    - Yes, I definitely will be
  - Current work ability compared with lifetime best on a scale from 0 to 10?"
    - 10 point VAS scale
      - 0= Cannot work at all
      - 10=Work ability at lifetime best



**Table I.** Thematic analysis of factors enabling work despite chronic health conditions

| Quotes from study participants                                                                                                                                                                                                                                                                                                                                                                                                                                                                                                                                                                                                                                                                                                                                                                                                                                                   | Condensation                                                                                                                                                 | Sub-theme                   | Main theme        |
|----------------------------------------------------------------------------------------------------------------------------------------------------------------------------------------------------------------------------------------------------------------------------------------------------------------------------------------------------------------------------------------------------------------------------------------------------------------------------------------------------------------------------------------------------------------------------------------------------------------------------------------------------------------------------------------------------------------------------------------------------------------------------------------------------------------------------------------------------------------------------------|--------------------------------------------------------------------------------------------------------------------------------------------------------------|-----------------------------|-------------------|
| <p><i>"There are no problems getting help. I've always had good gadgets, a suitable chair, a Mousetrapper mouse and other devices to help me at my workstation. I'm eternally grateful for this."</i> - participant number 6</p> <p><i>"I find it extremely hard to concentrate and take in what I'm doing when there are several of us in an office"</i> - participant number 7</p>                                                                                                                                                                                                                                                                                                                                                                                                                                                                                             | <p>No problems getting help when asking</p> <p>Problem to work undisturbed</p>                                                                               | Physical adaptation/aid     | <b>Adaptation</b> |
| <p><i>"I would have avoided a great deal of stomach-ache if it hadn't been so complicated. Because there is actually mental stress involved as well. The whole thing took a good year. If it had gone a bit more quickly, I might have perhaps been in a better state than I am now."</i> - participant number 4</p> <p><i>And I have a good boss who has been keen to find suitable tasks for me to do. My bosses have actually shown that they want things to work for me during the years that I've got left."</i> - participant number 10</p> <p><i>"I used to have greater responsibility in my job, but I felt that it got too much for me. I needed to change the tasks I did for the good of my health. This means that what works for me now is less responsibility, flexitime and I can manage my time better. I now enjoy my job too!"</i> - participant number 3</p> | <p>Modification, wish to get earlier</p> <p>New tasks – possibility for longer working life</p> <p>More flexibility, less responsibility, manage better</p>  | Modifications to work tasks |                   |
| <p><i>"I don't need to go off sick. If my work allows it, I can work flexitime and go home earlier that day to rest. And I can now also plan my new work tasks better."</i> participant number 10</p>                                                                                                                                                                                                                                                                                                                                                                                                                                                                                                                                                                                                                                                                            | Planning/own strategies reduces sick leave                                                                                                                   | Changes in approach to work |                   |
| <p><i>"When I'm doing my hobby and producing something with my hands, it's a way for me to get rid of everything – clear my memory somehow, as it were."</i> - participant number 1</p> <p><i>"Then, when I was given other work tasks to do I gained a better balance. I can do things in my spare time like go to the gym and do other nice things."</i> - participant number 10</p> <p><i>"If I could modify my current work more, I think I can work at 67, because I think the job is fun. Now I just feel I'm working, going home, sitting and doing nothing and"</i></p>                                                                                                                                                                                                                                                                                                  | <p>Spare time activities reduces mental stress</p> <p>Modifications to work tasks benefits private life</p> <p>Desire for more possibilities/adjustments</p> | Work-life balance           | <b>Life-style</b> |

|                                                                                                                                                                                                                                                                                                                                                                                                                                                                                                                                                                                                                                                                                                                                                                                    |                                                               |                              |                                                 |
|------------------------------------------------------------------------------------------------------------------------------------------------------------------------------------------------------------------------------------------------------------------------------------------------------------------------------------------------------------------------------------------------------------------------------------------------------------------------------------------------------------------------------------------------------------------------------------------------------------------------------------------------------------------------------------------------------------------------------------------------------------------------------------|---------------------------------------------------------------|------------------------------|-------------------------------------------------|
| <p>then I'm going to bed. I have no energy to train or invite friends, I can't even think of it. But I've actually searched for another job, [laughing], I'm 63 years old and have searched for another job! - participant number 9</p> <p>I'll be 63 soon. I have just started thinking about changing my work situation, maybe decrease working hours. I have not thought so before, but now the work takes so much energy and removes so much from my private life. I have no energy for my grandchildren nor my home, that's how it is</p> <p>"It's a health benefit to go to work, despite bad health. I am soon getting cleaning service at home, because I can't do it myself, it is an adjustment at home so I've got energy for work instead." - participant number 1</p> | <p>Unbalance work/leisure time</p> <p>Adjustments at home</p> |                              |                                                 |
| <p>"One thing that's extremely important is that if I don't move about, I feel worse. A gym class and yoga are very important, just as important as the medication I take." - participant number 10</p>                                                                                                                                                                                                                                                                                                                                                                                                                                                                                                                                                                            | <p>Time and energy for training/rehabilitation</p>            | <p>Physical activity</p>     |                                                 |
| <p>"I'm almost constantly in pain, but you still learn to live with it somehow." - participant number 9</p> <p>"I couldn't keep doing the job I was doing then, when I was very ill, but when I got better, I wanted this job 100% and everyone said that I was mad... But I said that it was maybe something that I could definitely do. Otherwise, I might as well stop." - participant number 7</p>                                                                                                                                                                                                                                                                                                                                                                             | <p>Learn to live with pain</p> <p>Believe in own ability</p>  | <p>Acceptance</p>            | <p><b>Confidence in one's own abilities</b></p> |
| <p>"If there's something wrong, I fix it. I don't just sit there and wait for someone else to do something." - participant number 1</p>                                                                                                                                                                                                                                                                                                                                                                                                                                                                                                                                                                                                                                            | <p>Can influence and control</p>                              | <p>Decision latitude</p>     |                                                 |
| <p>"I'm lucky that I think I've got a job that I enjoy and find interesting. Otherwise, I would have gone home a long time ago and gone on sick leave." - participant number 4</p>                                                                                                                                                                                                                                                                                                                                                                                                                                                                                                                                                                                                 | <p>Work interesting</p>                                       | <p>Intellectual stimulus</p> | <p><b>Motivation</b></p>                        |
| <p>"The job is extremely important. That's all there is to it. It's particularly important since I can enjoy the social aspect and be stimulated. It definitely means that I enjoy it a great deal." - participant number 7</p>                                                                                                                                                                                                                                                                                                                                                                                                                                                                                                                                                    | <p>Colleagues important</p>                                   | <p>Social cohesion</p>       |                                                 |
| <p>"... apart from working to pay for food and rent, work is definitely a major driving force for the social side of things, allowing you to feel that you can make a difference." - participant number 8</p>                                                                                                                                                                                                                                                                                                                                                                                                                                                                                                                                                                      | <p>Meaningful, can make a difference</p>                      | <p>Sense of purpose</p>      |                                                 |

|                                                                                                                                                                                                                                                                                                                                                                                                                                                                                                                                                                |                                                  |                        |                                   |
|----------------------------------------------------------------------------------------------------------------------------------------------------------------------------------------------------------------------------------------------------------------------------------------------------------------------------------------------------------------------------------------------------------------------------------------------------------------------------------------------------------------------------------------------------------------|--------------------------------------------------|------------------------|-----------------------------------|
| <p>1<br/>2<br/>3<br/>4<br/>5<br/>6<br/>7<br/>8<br/>9<br/>10<br/>11<br/>12<br/>13<br/>14<br/>15<br/>16<br/>17<br/>18<br/>19<br/>20<br/>21<br/>22<br/>23<br/>24<br/>25<br/>26<br/>27<br/>28<br/>29<br/>30<br/>31<br/>32<br/>33<br/>34<br/>35<br/>36<br/>37<br/>38<br/>39<br/>40<br/>41<br/>42<br/>43<br/>44<br/>45<br/>46</p> <p><i>"It was the prompt support I got from my boss and the company's healthcare team. I would say that it was completely down to the help I got and my own attitude that I could go back to work." - participant number 6</i></p> | <p>Early support at the employers initiative</p> | <p>Superiors</p>       | <p><b>Support from others</b></p> |
| <p><i>"I've got a specialist doctor and feel supported. I feel lucky. Then, I've got a good healthcare centre. I'm insisting on working. My doctor says that it is indeed up to me to decide this." - participant number 2</i></p>                                                                                                                                                                                                                                                                                                                             | <p>Adequate health care contacts</p>             | <p>Healthcare</p>      |                                   |
| <p><i>"One of the best sources of support came from the social insurance fund and my employer, who didn't push too hard." - participant number 10</i></p>                                                                                                                                                                                                                                                                                                                                                                                                      | <p>Cooperation on rehabilitation</p>             | <p>Social security</p> |                                   |

## COREQ (COnsolidated criteria for REporting Qualitative research) Checklist

A checklist of items that should be included in reports of qualitative research. You must report the page number in your manuscript where you consider each of the items listed in this checklist. If you have not included this information, either revise your manuscript accordingly before submitting or note N/A.

| Topic                                          | Item No. | Guide Questions/Description                                                                                                                              | Reported on Page No. |
|------------------------------------------------|----------|----------------------------------------------------------------------------------------------------------------------------------------------------------|----------------------|
| <b>Domain 1: Research team and reflexivity</b> |          |                                                                                                                                                          |                      |
| <i>Personal characteristics</i>                |          |                                                                                                                                                          |                      |
| Interviewer/facilitator                        | 1        | Which author/s conducted the interview or focus group?                                                                                                   |                      |
| Credentials                                    | 2        | What were the researcher's credentials? E.g. PhD, MD                                                                                                     |                      |
| Occupation                                     | 3        | What was their occupation at the time of the study?                                                                                                      |                      |
| Gender                                         | 4        | Was the researcher male or female?                                                                                                                       |                      |
| Experience and training                        | 5        | What experience or training did the researcher have?                                                                                                     |                      |
| <i>Relationship with participants</i>          |          |                                                                                                                                                          |                      |
| Relationship established                       | 6        | Was a relationship established prior to study commencement?                                                                                              |                      |
| Participant knowledge of the interviewer       | 7        | What did the participants know about the researcher? e.g. personal goals, reasons for doing the research                                                 |                      |
| Interviewer characteristics                    | 8        | What characteristics were reported about the interviewer/facilitator? e.g. Bias, assumptions, reasons and interests in the research topic                |                      |
| <b>Domain 2: Study design</b>                  |          |                                                                                                                                                          |                      |
| <i>Theoretical framework</i>                   |          |                                                                                                                                                          |                      |
| Methodological orientation and Theory          | 9        | What methodological orientation was stated to underpin the study? e.g. grounded theory, discourse analysis, ethnography, phenomenology, content analysis |                      |
| <i>Participant selection</i>                   |          |                                                                                                                                                          |                      |
| Sampling                                       | 10       | How were participants selected? e.g. purposive, convenience, consecutive, snowball                                                                       |                      |
| Method of approach                             | 11       | How were participants approached? e.g. face-to-face, telephone, mail, email                                                                              |                      |
| Sample size                                    | 12       | How many participants were in the study?                                                                                                                 |                      |
| Non-participation                              | 13       | How many people refused to participate or dropped out? Reasons?                                                                                          |                      |
| <i>Setting</i>                                 |          |                                                                                                                                                          |                      |
| Setting of data collection                     | 14       | Where was the data collected? e.g. home, clinic, workplace                                                                                               |                      |
| Presence of non-participants                   | 15       | Was anyone else present besides the participants and researchers?                                                                                        |                      |
| Description of sample                          | 16       | What are the important characteristics of the sample? e.g. demographic data, date                                                                        |                      |
| <i>Data collection</i>                         |          |                                                                                                                                                          |                      |
| Interview guide                                | 17       | Were questions, prompts, guides provided by the authors? Was it pilot tested?                                                                            |                      |
| Repeat interviews                              | 18       | Were repeat interviews carried out? If yes, how many?                                                                                                    |                      |
| Audio/visual recording                         | 19       | Did the research use audio or visual recording to collect the data?                                                                                      |                      |
| Field notes                                    | 20       | Were field notes made during and/or after the interview or focus group?                                                                                  |                      |
| Duration                                       | 21       | What was the duration of the interviews or focus group?                                                                                                  |                      |
| Data saturation                                | 22       | Was data saturation discussed?                                                                                                                           |                      |
| Transcripts returned                           | 23       | Were transcripts returned to participants for comment and/or                                                                                             |                      |

| Topic                                  | Item No. | Guide Questions/Description                                                                                                        | Reported on Page No. |
|----------------------------------------|----------|------------------------------------------------------------------------------------------------------------------------------------|----------------------|
|                                        |          | correction?                                                                                                                        |                      |
| <b>Domain 3: analysis and findings</b> |          |                                                                                                                                    |                      |
| <i>Data analysis</i>                   |          |                                                                                                                                    |                      |
| Number of data coders                  | 24       | How many data coders coded the data?                                                                                               |                      |
| Description of the coding tree         | 25       | Did authors provide a description of the coding tree?                                                                              |                      |
| Derivation of themes                   | 26       | Were themes identified in advance or derived from the data?                                                                        |                      |
| Software                               | 27       | What software, if applicable, was used to manage the data?                                                                         |                      |
| Participant checking                   | 28       | Did participants provide feedback on the findings?                                                                                 |                      |
| <i>Reporting</i>                       |          |                                                                                                                                    |                      |
| Quotations presented                   | 29       | Were participant quotations presented to illustrate the themes/findings?<br>Was each quotation identified? e.g. participant number |                      |
| Data and findings consistent           | 30       | Was there consistency between the data presented and the findings?                                                                 |                      |
| Clarity of major themes                | 31       | Were major themes clearly presented in the findings?                                                                               |                      |
| Clarity of minor themes                | 32       | Is there a description of diverse cases or discussion of minor themes?                                                             |                      |

Developed from: Tong A, Sainsbury P, Craig J. Consolidated criteria for reporting qualitative research (COREQ): a 32-item checklist for interviews and focus groups. *International Journal for Quality in Health Care*. 2007. Volume 19, Number 6: pp. 349 – 357

**Once you have completed this checklist, please save a copy and upload it as part of your submission. DO NOT include this checklist as part of the main manuscript document. It must be uploaded as a separate file.**
